# Supplementary material for: Added value of an open narrative in verbal autopsies: a mixed-methods evaluation from Malawi
Source: PubMed Central journal article supplement (PMC7871275; doi:10.1136/bmjpo-2020-000961), 2021-02-05
Supplement: bmjpo-2020-000961.draft_revisions.pdf [file bmjpo-2020-000961.draft_revisions.pdf]

# BMJ Paediatrics Open

BMJ Paediatrics Open is committed to open peer review. As part of this commitment we make the peer review history of every article we publish publicly available.

When an article is published we post the peer reviewers' comments and the authors' responses online. We also post the versions of the paper that were used during peer review. These are the versions that the peer review comments apply to.

The versions of the paper that follow are the versions that were submitted during the peer review process. They are not the versions of record or the final published versions. They should not be cited or distributed as the published version of this manuscript.

BMJ Paediatrics Open is an open access journal and the full, final, typeset and author-corrected version of record of the manuscript is available on our site with no access controls, subscription charges or pay-per-view fees (<http://bmjpaedsopen.bmj.com>).

If you have any questions on BMJ Paediatrics Open's open peer review process please email [info.bmjpo@bmj.com](mailto:info.bmjpo@bmj.com)

# BMJ Paediatrics Open

## The added value of an open narrative in verbal autopsies – a mixed-methods evaluation from Malawi

|                               |                                                                                                                                                                                                                                                                                                                                                                                                                                                                                                                                                                                                                                                     |
|-------------------------------|-----------------------------------------------------------------------------------------------------------------------------------------------------------------------------------------------------------------------------------------------------------------------------------------------------------------------------------------------------------------------------------------------------------------------------------------------------------------------------------------------------------------------------------------------------------------------------------------------------------------------------------------------------|
| Journal:                      | <i>BMJ Paediatrics Open</i>                                                                                                                                                                                                                                                                                                                                                                                                                                                                                                                                                                                                                         |
| Manuscript ID                 | bmjpo-2020-000961                                                                                                                                                                                                                                                                                                                                                                                                                                                                                                                                                                                                                                   |
| Article Type:                 | Original research                                                                                                                                                                                                                                                                                                                                                                                                                                                                                                                                                                                                                                   |
| Date Submitted by the Author: | 24-Nov-2020                                                                                                                                                                                                                                                                                                                                                                                                                                                                                                                                                                                                                                         |
| Complete List of Authors:     | Loh, Patricia; University College London, Institute for Global Health<br>Fottrell, Edward; University College London, Institute for Global Health<br>Beard, James; University College London, Institute for Global Health<br>Bar-Zeev, Naor; Malawi-Liverpool-Wellcome Trust Clinical Research Programme<br>Phiri, Tambosi; MaiMwana Project,<br>Banda, Masford; MaiMwana Project<br>Makwenda, Charles; Parent and Child Health Initiative<br>Bird, Jon; University of Bristol, Department of Computer Science<br>King, Carina; University College London, Institute for Global Health;<br>Karolinska Institute, Department of Global Public Health |
| Keywords:                     | Data Collection, Ethics, Mortality, Qualitative research                                                                                                                                                                                                                                                                                                                                                                                                                                                                                                                                                                                            |
|                               |                                                                                                                                                                                                                                                                                                                                                                                                                                                                                                                                                                                                                                                     |

SCHOLARONE™  
Manuscripts

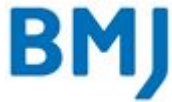

I, the Submitting Author has the right to grant and does grant on behalf of all authors of the Work (as defined in the below author licence), an exclusive licence and/or a non-exclusive licence for contributions from authors who are: i) UK Crown employees; ii) where BMJ has agreed a CC-BY licence shall apply, and/or iii) in accordance with the terms applicable for US Federal Government officers or employees acting as part of their official duties; on a worldwide, perpetual, irrevocable, royalty-free basis to BMJ Publishing Group Ltd ("BMJ") its licensees and where the relevant Journal is co-owned by BMJ to the co-owners of the Journal, to publish the Work in this journal and any other BMJ products and to exploit all rights, as set out in our [licence](#).

The Submitting Author accepts and understands that any supply made under these terms is made by BMJ to the Submitting Author unless you are acting as an employee on behalf of your employer or a postgraduate student of an affiliated institution which is paying any applicable article publishing charge ("APC") for Open Access articles. Where the Submitting Author wishes to make the Work available on an Open Access basis (and intends to pay the relevant APC), the terms of reuse of such Open Access shall be governed by a Creative Commons licence – details of these licences and which [Creative Commons](#) licence will apply to this Work are set out in our licence referred to above.

Other than as permitted in any relevant BMJ Author's Self Archiving Policies, I confirm this Work has not been accepted for publication elsewhere, is not being considered for publication elsewhere and does not duplicate material already published. I confirm all authors consent to publication of this Work and authorise the granting of this licence.

1  
2  
3 **Title:** The added value of an open narrative in verbal autopsies – a mixed-methods evaluation from  
4 Malawi  
5

6 **Authors:** Patricia Loh<sup>1</sup>, Edward Fottrell<sup>1</sup>, James Beard<sup>1</sup>, Naor Bar-Zeev<sup>2,3</sup>, Tambosi Phiri<sup>4</sup>, Masford  
7 Banda<sup>4</sup>, Charles Makwenda<sup>4</sup>, Jon Bird<sup>5</sup>, Carina King<sup>1,6\*</sup>  
8  
9

10 **Affiliations:**

- 11  
12 1. Institute for Global Health, University College London, London, UK  
13 2. Malawi Liverpool Wellcome Trust Clinical Research Programme, Blantyre, Malawi  
14 3. International Vaccine Access Center, Department of International Health, Bloomberg School of  
15 Public Health, Johns Hopkins University, Baltimore MD, USA.  
16 4. MaiMwana Project, Parent and Child Health Initiative, Lilongwe, Malawi  
17 5. Department of Computer Science, University of Bristol, Bristol, UK  
18 6. Department of Global Public Health, Karolinska Institutet, Stockholm, Sweden  
19  
20  
21

22 **\*Corresponding author:**

23  
24 Institute for Global Health, University College London, 30 Guildford Street, London WC1N 1EH.

25 Email: [c.king@ucl.ac.uk](mailto:c.king@ucl.ac.uk)  
26  
27

28 **Word count:** 3,621  
29  
30  
31  
32  
33  
34  
35  
36  
37  
38  
39  
40  
41  
42  
43  
44  
45  
46  
47  
48  
49  
50  
51  
52  
53  
54  
55  
56  
57  
58  
59  
60

## Abstract

### Background

The WHO standardised verbal autopsy (VA) instrument includes closed questions, ascertaining signs and symptoms of illness preceding death, and an optional open narrative. As VA analyses increasingly use automated algorithms, inclusion of narratives should be justified. We evaluated the role of open narratives on VA processes, data quality and respondent emotion.

### Methods

A mixed-methods analysis was conducted using VA data for children deaths (0–59 months), between 04/2013–11/2016 in Mchinji district, Malawi. Deaths were randomised at the point of interview to receive closed questions only or open narrative followed by closed questions. Upon concluding the VA, interviewers self-completed questions relating to respondent emotions. Logistic regression was conducted to determine associations with visible emotions during VAs. A group discussion with interviewers was conducted at the project end, to understand field experiences and explore future recommendations; data were coded using deductive themes.

### Results

2509 VAs were included, with 49.8% (n=1341) randomised to open narratives. Narratives lasted a median of 7 minutes (range: 1–113). Interviewers described improved rapport and felt narratives improved data quality, although there was no difference in the proportion of deaths with an indeterminate cause (5.3% vs. 6.1%). The majority of respondents did not display visible emotions (81%). Those with a narrative had higher, but not statistically significant, odds of displaying emotion (aOR: 1.20; 95% CI: 0.98, 1.47). Factors associated with visible emotion were: infant deaths versus neonates; deaths at a health centre or on-route to hospital versus home; and higher socio-economic status. Non-parental respondents and increased time between death and interview were associated with lower odds of emotion.

### Conclusion

Conducting an open narrative to build rapport, something valued by the interviewers, may outweigh additional time and emotional burdens. However, these burdens may be further justified if the quality and utility of information from the narrative was promoted through standardised recommendations.

**What is known about the topic**

- Verbal autopsies are often conducted in contexts where civil registration systems are lacking or incomplete.
- There are several different tools for conducting these interviews, some containing an open narrative section, where respondents describe the events leading to a death in their own words.
- Automated methods for analysing verbal autopsies often do not use the data from narratives and therefore there should be a clear and justified reason for conducting this section of the interview.

**What this study adds**

- Data collectors reported the narratives as a way to build rapport with the respondents, and felt this improved their ability to collect better quality information.
- While respondents mostly did not show visible signs of emotions during interviews, this was more frequent but statistically non-significant, in those with a narrative.
- There may be a trade-off in the increased time and emotional burden of verbal autopsies which contain a narrative section, with the ability to establish a connection between data collectors and respondents.

## Background

A comprehensive civil registration and vital statistics (CRVS) system recording births and deaths provides a country with essential information to make informed decisions for country-specific priority-setting, and measure its progress towards the Sustainable Development Goals (1, 2). In the absence of functional CRVS structures, verbal autopsies (VA) can partly fill this gap as an interim mortality data collection instrument by providing cause-specific mortality estimates (3-5). These data can be used by governments, healthcare providers, researchers, donors and policy makers, who rely on accurate and comparable data over time to estimate burdens of diseases at population level, evaluate program implementation and complement routine administrative data (1, 6). A recent review supported the use of VA to identify vulnerable groups and health needs for effective resource allocation in humanitarian settings (7).

The VA process involves trained fieldworkers identifying and interviewing an appropriate respondent, usually a close relative or caregiver, for a given death (3). Events preceding the death are recorded using a survey with a pre-determined set of closed questions, which can be supplemented by a free-text open narrative designed to elicit the story in the respondent's own words of how the death occurred (8). Following this, a suspected cause of death is generally assigned through physician review, or through the automated application of statistical algorithms (e.g. InterVA or SmartVA) (3-5).

In 2006, up to 18 VA tools with varying combinations of closed questions and open narratives were reportedly being used in 13 countries (9). The World Health Organization (WHO) published the first iteration of a standardised VA methodology in 2007, with subsequent updates in 2012, 2014 and 2016 (8). The inclusion of an open narrative section remains recommended, but optional. The role of the narrative in physician-coded VAs has been likened to a medical history used by doctors to make diagnoses (10). It can also encourage interviewer-respondent rapport, providing respondents a more natural outlet to express themselves and recount events they feel were most relevant (11). The open narrative can also provide valuable information that standardised closed questions do not capture, such as cultural beliefs, adding context and holding authorities accountable to design interventions and services that are responsive to its people's needs (9, 12, 13). In contrast, it could be argued that such information could be better identified using structured social autopsy tools – a supplementary survey conducted specifically to identify non-medical causes of death (7, 14).

The emotional strain of a VA has been recently detailed in qualitative studies from Ghana,(15) Papua New Guinea,(16) and Nepal,(17) and fieldworkers from South Africa reported a higher likelihood of respondents becoming emotional during the open narrative compared to closed question sections of the interview (18). Furthermore, the potential for adverse effects of VA-induced distress on data quality, and the diagnostic influence this might have for assigning cause of death is important to understand (12, 19, 20).

This paper explores the role of the open narrative in the VA process, including its effects on interview procedures, data quality and respondent emotion. As the narrative potentially poses an additional burden on both respondents and interviewers, and VAs are increasingly analysed using automated algorithms that do not use these free-text responses, their inclusion in the VA process should be justified.

## Methods

We conducted a mixed-methods analysis of VA process data for deaths of children aged 0–59 months collected prospectively from April 2013 to November 2016, as part of the VacSurv Study in Mchinji District, Malawi (21). Mchinji is a rural agricultural district in the central region of Malawi, with a population of approximately 600000, under-5 mortality rate of 63 per 1000 livebirths and crude birth rate of 32.2 at the time of data collection (22).

### *Mortality Surveillance*

Full details of the population surveillance system used by the VacSurv Study have been previously described (21, 23). Briefly, deaths in children aged 0–59 months, including stillbirths, were registered retrospectively from October 2011 to February 2012, and prospectively from March 2012 to June 2016. Births and deaths were reported by 1060 volunteer village informants who cumulatively covered the whole of Mchinji District, supervised by 50 enumerators and eight senior monitoring and evaluation officers (MEOs). Data were submitted using paper forms to the central office monthly where it was entered into a Microsoft Access database. Major errors in identification data (e.g. incompatible dates of birth and death) were sent back to the field for verification. All deaths in children under-5 years were extracted from the cleaned data, and pre-printed forms with a unique barcode containing the participant's study ID were generated.

### *Verbal Autopsies*

Deaths were prospectively randomised at the point of interview to either: 1) closed questions only; or 2) open narrative followed by closed questions. Randomisation was programmed into the electronic data capture form (Open Data Kit software),(24) and the MEOs were informed of the allocation after the respondent had consented to the interview. The respondent was blinded to the randomisation procedure, but MEOs were unblinded to the purpose of randomisation. The open narrative was unstructured and MEOs could choose how they recorded the details, such as audio-recording and subsequent transcription, notes or direct transcription of the story during the interview. The closed questions were WHO's 2012 VA instrument,(25) translated into Chichewa.

### *Data Collection*

The VAs were conducted at respondents' homes by nine different MEOs, each with five or more years' experience in conducting VAs. They underwent a one-week training where they collectively translated the WHO VA questionnaire, reviewed the study protocol including data collection using smartphones and strategies to conduct the interviews sensitively, and conducted supervised mock interviews.(12)

At the end of each VA, MEOs self-completed post-interview questions. MEOs were asked to document the respondents present, emotions during the interview and whether the interview needed to be paused as a result. Total VA interview duration was automatically captured on the smartphone, and MEOs noted the start and end time of the open narrative on the paper form.



1  
2  
3 Closed questions were collected using ODK Collect on Android smartphones and narratives were  
4 submitted as written transcripts on the pre-printed forms. These were entered into a Microsoft  
5 Access database, and data were linked using the participants' study ID, then cleaned and processed.  
6  
7  
8

### 9 *Quantitative Analysis*

10 Child characteristics and VA process data were described with proportions, means and standard  
11 deviations (SD) for normally distributed continuous data or medians and interquartile ranges (IQR)  
12 for asymmetrically distributed data. The types of emotion, ability to assign a cause of death, and  
13 duration of VA were compared between those with and without an open narrative, using t- and chi2  
14 tests.  
15  
16  
17

18 Cause of death was assigned using InterVA-4 ([www.interva.net](http://www.interva.net)) based on closed question responses  
19 only; respondents had the option of answering with 'yes', 'no' or 'don't know'. InterVA uses a  
20 Bayesian model to calculate the likelihood of different causes of death based on positive ('yes')  
21 closed question responses only. The number of 'yes' answers and subsequently the ability to assign  
22 probable cause of death were used as a proxy measure of data quality from respondents. Emotion  
23 and interview duration were chosen as proxy indicators of burden for respondents and interviewers.  
24 Stillbirths were excluded from the analysis as we used a locally modified VA tool for these deaths.  
25  
26  
27

28 The primary analysis was a per-protocol analysis, excluding interviews in which MEOs documented  
29 that a narrative was conducted when allocated to not include one, and vice versa. We compared  
30 respondent emotion during the interview between those with and without a narrative. A  
31 multivariable logistic regression was conducted, adjusted for potential confounders defined *a priori*  
32 as: main respondent, child's age and sex, location of death and socio-economic tercile. All analyses  
33 were conducted with Stata 15.0.  
34  
35  
36  
37

### 38 *Qualitative Data Collection and Analysis*

39 At study completion, a group discussion was held with the MEOs who conducted VAs during the  
40 project to gather their feedback on the utility of the open narrative and recommendations for VA  
41 procedures going-forward. This group discussion was led by the technical advisor (CK) in a private  
42 room within the office using a structured topic guide (**Web-Appendix 1**). The discussion was  
43 conducted in English, audio-recorded and transcribed verbatim. The data was then coded using the  
44 following deductive themes, based on the aim of the study: the interview process and procedures;  
45 perceived data quality; and emotions in VAs. The final analysis was shared with the MEOs, after  
46 triangulation with the quantitative analysis to check for interpretation.  
47  
48  
49  
50  
51

### 52 *Patient and Public Involvement*

53 Prior to community verbal autopsies beginning, the overall VacSurv Study protocol was presented to  
54 the District Executive Committee and District Health Management team in Mchinji for input and  
55 approval. Extensive community engagement was conducted before data collection, and continued  
56 throughout the study, through village level key informant volunteers, area development committees  
57 and radio jingles. Community consent from traditional leaders was sought during study  
58 introduction.  
59  
60

## Ethics

Verbal informed consent was obtained for all VA interviews, and written consent for the group discussion participants. The study was approved by the National Health Sciences Research Ethics Committee in Malawi [#837], London School of Hygiene and Tropical Medicine, UK [#6047] and Centers for Disease Control and Prevention, USA [#6268].

## Results

A total of 3623 under-5 deaths were reported during the study period, and 2509 were included in the analysis (**Figure 1**). Overall, 50.2% (n=1352) were allocated to no narrative and 49.8% (n=1341) to have an open narrative, with 95% and 94% of VAs conducted per-protocol in each arm. Balance in the randomisation was achieved for respondent type, socio-economic status, child sex and time since the death. However more open narrative interviews were conducted for neonates (44.5% versus 39.9%,  $p$ -value=0.042) and location of death differed between the two groups (**Web-Appendix 2**). Of the deaths, 41.9% were neonates, 52.9% were male and 31.8% occurred at home (**Web-Appendix 2**). Primary respondents were mainly mothers (77.0%, n=1931), followed by grandparents (10.6%, n=266) and fathers (8.0%, n=200). The mean time between death and verbal autopsy was 22.5 weeks (range: 1–52 weeks). We present the quantitative and qualitative results together under the following themes: VA processes, data quality and emotions.

### VA Processes and Procedures

Open narratives took a median of 7 minutes (range: 1–113 minutes) and closed questions took 17.5 minutes (range: 6–164 minutes). Overall, interviews which included narratives took longer to complete, with 32.3% taking longer than 30 minutes compared to only 5.2% of those without a narrative ( $p$ -value < 0.001), with the accompanying closed questions correspondingly taking longer on average to complete (**Table 1**).

From the group discussion, MEOs reported narratives generally taking between 3 and 15 minutes. A key factor in the duration of these was the respondent and whether they were capable and willing to respond. Respondents who were keen to relay their story were reported to do so without prompting, including in interviews randomised to not include a narrative. Conversely respondents who were hard to engage in interviews with a narrative were also reported.

*“My experience has been that after getting consent sometimes a respondent starts to recount before you ask, so you don’t interrupt, you just listen. But because your phone has asked you not to take an open history, you don’t take notes on that, you just go straight to the questions.”* (MEO 8)

*“And you can see that there were some open histories that were very short, maybe just 2 minutes [general agreement]. You just know that the respondent was not ready to give you information. It happened like that.”* (MEO 2)

1  
2  
3 However, in general the MEOs agreed that the main difference in interviews with and without open  
4 narratives was the time taken. Not taken into consideration in the quantitative measures of duration  
5 was the time to identify appropriate respondents before an interview could start. This could involve  
6 multiple visits to a respondent's household before an appropriate respondent could be located (e.g.  
7 mother or father), or needing to gain community trust to access the respondent.  
8  
9

10 *"But some other times it may take even 10 minutes because these people know who you want to talk*  
11 *to you, but they are trying to shield them because they are not very sure at first what you've come to*  
12 *do."* (MEO 1)  
13  
14

15 When asked what they would recommend as the best VA procedure, there was a consensus that  
16 both the open narrative and closed questions were important and should be included: *"The best way*  
17 *is the one which has the open history, that way you have the full explanation."* (MEO 7)  
18  
19  
20  
21

### 22 *Data Quality*

23

24 Based on InterVA analysis of closed questions, 94.3% of deaths had a cause of death assigned; there  
25 was no difference between those with and without an open narrative (94.7% versus 93.9%, *p*-  
26 value=0.404). Comparing the number of positive responses in the closed questions found no  
27 differences with a mean of 22.4, 21.4 and 21.8 "yes" answers for neonates, infant and child VA  
28 interviews (**Table 2**). The addition of the open narrative was not associated with respondents  
29 expressing a desire to know or suggest a potential cause of death.  
30  
31

32 There was consensus from the MEOs that data collected was of better quality when they conducted  
33 an open narrative. The first reason was that they effectively asked the questions twice, once as the  
34 narrative and then a second time in the closed questions, enabling them to cross-check responses.  
35 Secondly, MEOs reported respondents being more comfortable narrating a story than responding to  
36 "yes/no" questions.  
37  
38

39 *"I have that feeling that, without the open history, the quality is compromised. Because it's like the*  
40 *recall system, the set-up of the brain of the respondent, is disturbed by question time and again.*  
41 *Unlike when he or she is free to express everything from her memory, it happens to be good quality*  
42 *data [...] I think that open history gives a respondent a feeling that you are really concerned, because*  
43 *you take a lot of time to listen to him or her."* (MEO 8)  
44  
45  
46

47 While only 28.2% of respondents were recorded as providing a cause of death (**Table 2**), the MEOs  
48 noted that caregivers would often give a reason for their child's death – especially if they had sought  
49 care. However, they also noted that cause of death was not limited to medical reasons:  
50  
51

52 *"In their narrations, they will tell you the cause, 'yes this baby was suffering from malaria, but we*  
53 *think this baby died because they delayed in referring us to a health centre'. Maybe in the most*  
54 *remote areas there was no ambulance, they were told to come to the [town] but the ambulance was*  
55 *not available. They were told to look for their own transport to the [town]. So they will tell you those*  
56 *ones as reasons, not the actual sickness of the baby."* (MEO 4)  
57  
58  
59  
60

### Emotion

In the majority of interviews, respondents did not display visible signs of emotion (81%), with similar proportions between those with and without an open narrative (79.7% versus 82.4%,  $p$ -value=0.089). Of those who were recorded as showing signs of emotions, 3.4% cried, 26.7% had a long silence and 69.9% displayed other signs of emotion – over half of these interviews needed to be paused once or more (**Table 2**).

**Table 3** shows the logistic regression for respondent emotion. While having an open narrative was associated with 20% (aOR: 1.20; 95% CI: 0.98, 1.47) higher likelihood of the respondent becoming emotional during the interview; this was not statistically significant but may be pragmatically relevant. Factors associated with lower odds of becoming emotional during the VA interview included: non-parental respondents and increased time between the death and interview (2% lower odds for each week passed). Factors associated with increased odds of visible displays of emotion include: deaths amongst infants compared to neonates (aOR: 1.42; 95% CI: 1.09, 1.85); the death occurring at a health centre (aOR: 1.36; 95% CI: 1.04, 1.77) or en-route to hospital (aOR: 1.49; 95% CI: 1.00, 2.22); and being in the middle (aOR 1.52; 95% CI: 1.17, 1.97) or highest wealth tercile (aOR: 1.49; 95% CI: 1.13, 1.95).

The emotion of respondents was not directly raised by the MEOs during the discussion; however, they noted a key challenge in conducting the VAs as being unable to help respondents or feeling hopeless when respondents related their stories. They raised specific examples around HIV positive respondents seeking advice or requests for referrals of malnourished children to NGO programmes.

*“A challenge, in a nut shell, was not being able assist where questions were raised. You have raised questions to them. In the end they raise questions to you, that need action, for you to not be able to do anything. That was a big challenge and a let-down.”* (MEO 4)

The MEOs raised the fact that the VA process is emotional from the interviewer’s perspective, as well as the respondent, with many of the MEOs also having families and young children which can relate to the narrative.

*“The verbal autopsies are not easy to be carried as they involve or concern somebody who has lost life, so it’s always emotional between the interviewer and the interviewee”* (MEO 2)

### Discussion

Using a mixed-methods analysis of VA process data amongst children under-five in Malawi, we explored the role of open narratives on the interview process, data quality and respondents’ emotions. As expected, free-text narratives increased the duration of the VA interview but did not impact on the ability of a Bayesian algorithm to assign a cause of death - the proxy we used for data quality. The interviewers considered the open narrative useful in building rapport with respondents, agreeing with previously reported experiences, (11, 26) and believed it subsequently improved the VA data. However, respondents with an open narrative displayed visible emotions more frequently when compared to those without, even if visible respondent emotion was relatively uncommon.

1  
2  
3 Although previous studies have observed VA-induced emotional stress amongst respondents, (16-  
4 18, 27) exploring characteristics of both the respondent and deceased showed interesting  
5 associations with visible emotion. Firstly, respondents were more likely to show emotion if they  
6 were of a higher socio-economic status. One hypothesis could be that under-five deaths are more  
7 common amongst lower socio-economic households; (28) specifically in Malawi, a study reported an  
8 under-five mortality of 52/1000 livebirths in the highest wealth group, compared to 69/1000 in  
9 middle and low wealth groups (29). The 'unexpectedness' of deaths amongst children has been  
10 found to be associated with increased parental grief previously (30). Therefore, as these are rarer  
11 events in families which are less underprivileged, with fewer perceived barriers to healthcare and  
12 prevention, this may affect respondent emotion.  
13  
14  
15

16 We observed that deaths occurring at health centres or en-route to hospital was associated with  
17 increased emotion. This may reflect respondents' perception or experience of poor quality of care,  
18 resulting in frustrations at system failures and delays in referrals and receiving care. This was echoed  
19 by the MEOs, and prior data from this setting,(12) who described respondents attributing deaths to  
20 non-medical causes. Deficiencies in Malawian healthcare facilities' ability to deliver quality maternal,  
21 newborn and child care, have been found,(31) and modelled estimates suggest that poor quality  
22 maternal and newborn care result in considerable preventable mortality (32). Caregiver frustration  
23 with healthcare provision and challenges in reaching referral facilities is therefore understandable.  
24  
25  
26

27 Although the MEOs perceived better rapport and improved data quality from VAs with open  
28 narratives, we did not observe any differences in the number of "yes" responses and the subsequent  
29 proportion of VAs with an assigned cause of death. Earlier findings from Malawi showed limited  
30 advantage in including open narratives to assign cause of death (12), however in this case it is hard  
31 to know whether individual answers would have been different. The added diagnostic value of the  
32 free-text narratives was also examined by Rankin et al., (19) who reported that the addition of the  
33 narrative did not explain discrepancies in diagnoses between physician and InterVA analyses. This  
34 could be due to narratives capturing indicators which are included in closed questions. A key  
35 principle in research ethics is to avoid intrusions;(33) therefore, if narrative data is not intended for  
36 analysis and does not appear to have any influence on data quality, documenting these data may  
37 pose an unnecessary burden.  
38  
39  
40  
41

42 A key limitation of our study was our reliance on interviewer-observed signs of respondent emotion.  
43 The MEO self-completed post-VA questionnaire may have suffered from the subjective nature of  
44 emotion and possible cultural norms of private bereavement. Including questions on respondent-  
45 reported emotional distress and interviewer self-reported emotion may have provided richer  
46 information. Secondly, it is likely that protocol violations occurred, as MEOs reported respondents  
47 being unwilling or unable to fully engage in the open narrative, and conversely narrating the story of  
48 their child's death without prompt. This is not unlike the reluctance observed in VA respondents in  
49 rural Ghana who occasionally denied interviews due to grief (15). While we planned a per-protocol  
50 analysis, we were unable to fully adjust for these violations in the quantitative analysis, and our  
51 results may therefore more closely reflect intention to treat. Finally, the group discussion with the  
52 MEOs was led by the technical advisor, possibly leading to social-desirability bias limiting their  
53 willingness to highlight concerns or deviations from the protocol.  
54  
55  
56  
57  
58  
59  
60

## Conclusion

As far as we are aware, this is the first study to report the effect of open narratives during VA interviews on respondent emotion. Evidence from this large-scale evaluation suggests that open narratives do not necessarily affect data quality, but play a role in establishing rapport, which was clearly valued by interviewers. From the interviewer perspective, conducting an open narrative at the start of the VA may therefore outweigh the additional time burden and the slight increase in respondents becoming emotional. Any undue burden associated with having an open narrative would be further justified if the quality and utility of information from the narrative can be guaranteed. We would therefore recommend guidance from leading bodies, such as the WHO VA Reference Group, for a more standardised approach to record and analyse free-text narratives with a view to reducing bias introduced by those involved during the process such as interviewers, transcribers and reviewers. We would also support longer waiting periods between death and time of interview, so long as accurate recall is not negatively impacted, and the inclusion of wider non-parental family members to reduce the emotional burdens associated with the sensitive nature of discussing death.

## Declarations

### *Ethics approval and consent to participate*

The study was approved by the National Health Sciences Research Ethics Committee in Malawi [#837], London School of Hygiene and Tropical Medicine, UK [#6047] and Centers for Disease Control and Prevention, USA [#6268]. Verbal informed consent was sought from respondents prior to starting the verbal autopsy interviews. Consent was documented in the electronic data capture form.

### *Consent for publication*

Not applicable.

### *Availability of data and materials*

Fully anonymised quantitative and qualitative datasets generated and analysed for the purpose of this study are available from the corresponding author, Dr. Carina King ([c.king@ucl.ac.uk](mailto:c.king@ucl.ac.uk)) on reasonable request for research purposes only, following approval from the National Health Sciences Research Ethics Committee in Malawi, and study Principal Investigators.

### *Competing interests*

The authors declare that they have no competing interests.

### *Funding*

This VacSurv Project was funded by a Wellcome Trust Programme Grant (WT091909/B/10/Z) to Neil French, Nigel Cunliffe, Rob Heyderman; an investigator-initiated grant by GlaxoSmithKline Biologicals to Nigel Cunliffe, NBZ, Neil French; a Wellcome Trust Strategic Award to Anthony Costello (Number: 085417ma/Z/08/Z); and MLW core grant strategic award to Rob Heyderman.

### Author contributions

This study was conceived by PL, EF and CK, based on data from a larger research question conceived by NBZ, BJB, JB, EF and CK. The data was collected under the oversight of TP, CM, and MB. The quantitative data was analysed by PL and the qualitative data was coded and analysed by CK. The manuscript was written by PL, with significant input from CK. All authors read, commented and approved the manuscript.

### Acknowledgments

We would like to thank the communities and families participating in the study, the key informants for volunteering their time and the Traditional Authorities of Mchinji district and Chilumba, Karonga district for their support. We are very grateful for the hard work of our field and data staff. We thank the other VacSurv Consortium members: Neil French and Nigel Cunliffe (University of Liverpool); Rob Heydermann and Anthony Costello (University College London); Amelia Crampin (University of Glasgow); Osamu Nakagomi (University of Nagasaki); Jacqueline E. Tate and Umesh D. Parashar (Centers for Disease Control & Prevention, Atlanta, GA, USA). The findings and conclusions in this report are those of the authors and do not necessarily represent the official position of the US Centers for Disease Control and Prevention.



## References

1. Thomas LM, D'Ambruoso L, Balabanova D. Verbal autopsy in health policy and systems: a literature review. *BMJ Glob Health*. 2018;3(2):e000639.
2. World health statistics 2018: monitoring health for the SDGs, sustainable development goals. Geneva; 2018.
3. D'Ambruoso L, Kahn K, Wagner RG, Twine R, Spies B, van der Merwe M, et al. Moving from medical to health systems classifications of deaths: extending verbal autopsy to collect information on the circumstances of mortality. *Glob Health Res Policy*. 2016;1:2.
4. Fottrell E, Byass P. Verbal Autopsy: Methods in Transition. *Epidemiologic Reviews*. 2010;32(1):38-55.
5. Murray CJL, Lozano R, Flaxman AD, Serina P, Phillips D, Stewart A, et al. Using verbal autopsy to measure causes of death: the comparative performance of existing methods. *BMC Medicine*. 2014;12(1):5.
6. AbouZahr C. Verbal autopsy: who needs it? *Population Health Metrics*. 2011;9(1):19.
7. Thomas LM, D'Ambruoso L, Balabanova D. Use of verbal autopsy and social autopsy in humanitarian crises. *BMJ Glob Health*. 2018;3(3):e000640.
8. Verbal autopsy standards: the 2016 WHO verbal autopsy instrument [online]. 2017.
9. Soleman N, Chandramohan D, Shibuya K. Verbal autopsy: current practices and challenges. *Bulletin of the World Health Organization*. 2006;84(3):239 - 45.
10. Reeves BC, Quigley M. A review of data-derived methods for assigning causes of death from verbal autopsy data. *International Journal of Epidemiology*. 1997;26(5):1080-9.
11. Lerer LB, Butchart A, Blanche MT. 'A bothersome death' —Narrative accounts of infant mortality in Cape Town, South Africa. *Social Science & Medicine*. 1995;40(7):945-53.
12. King C, Zamawe C, Banda M, Bar-Zeev N, Beard J, Bird J, et al. The quality and diagnostic value of open narratives in verbal autopsy: a mixed-methods analysis of partnered interviews from Malawi. *BMC Medical Research Methodology*. 2016;16(1):13.
13. Gouda HN, Flaxman AD, Brolan CE, Joshi R, Riley ID, AbouZahr C, et al. New challenges for verbal autopsy: Considering the ethical and social implications of verbal autopsy methods in routine health information systems. *Soc Sci Med*. 2017;184:65-74.
14. Moyer CA, Johnson C, Kaselitz E, Aborigo R. Using social autopsy to understand maternal, newborn, and child mortality in low-resource settings: a systematic review of the literature. *Glob Health Action*. 2017;10(1):1413917.
15. Aborigo RA, Allotey P, Tindana P, Azongo D, Debpuur C. Cultural imperatives and the ethics of verbal autopsies in rural Ghana. *Global Health Action*. 2013;6(1):18570.
16. Gouda HN, Kelly-Hanku A, Wilson L, Maraga S, Riley ID. "Whenever they cry, I cry with them": Reciprocal relationships and the role of ethics in a verbal autopsy study in Papua New Guinea. *Soc Sci Med*. 2016;163:1-9.
17. Morrison J, Fottrell E, Budhatokhi B, Bird J, Basnet M, Manandhar M, et al. Applying a Public Health Ethics Framework to Consider Scaled-Up Verbal Autopsy and Verbal Autopsy with Immediate Disclosure of Cause of Death in Rural Nepal. *Public Health Ethics*. 2018;11(3):293-310.
18. Bird J, Byass P, Kahn K, Mee P, Fottrell E. A matter of life and death: practical and ethical constraints in the development of a mobile verbal autopsy tool. *Proceedings of the SIGCHI Conference on Human Factors in Computing Systems*; Paris, France: Association for Computing Machinery; 2013. p. 1489–98.
19. Rankin JC, Lorenz E, Neuhann F, Yé M, Sié A, Becher H, et al. Exploring the role narrative free-text plays in discrepancies between physician coding and the InterVA regarding determination of malaria as cause of death, in a malaria holo-endemic region. *Malaria Journal*. 2012;11(1):51.
20. Joshi R, Praveen D, Chow C, Neal B. Effects on the estimated cause-specific mortality fraction of providing physician reviewers with different formats of verbal autopsy data. *Population Health Metrics*. 2011;9(1):33.

- 1
  - 2
  - 3
  - 4
  - 5
  - 6
  - 7
  - 8
  - 9
  - 10
  - 11
  - 12
  - 13
  - 14
  - 15
  - 16
  - 17
  - 18
  - 19
  - 20
  - 21
  - 22
  - 23
  - 24
  - 25
  - 26
  - 27
  - 28
  - 29
  - 30
  - 31
  - 32
  - 33
  - 34
  - 35
  - 36
  - 37
  - 38
  - 39
  - 40
  - 41
  - 42
  - 43
  - 44
  - 45
  - 46
  - 47
  - 48
  - 49
  - 50
  - 51
  - 52
  - 53
  - 54
  - 55
  - 56
  - 57
  - 58
  - 59
  - 60
21. Bar-Zeev N, Kapanda L, King C, Beard J, Phiri T, Mvula H, et al. Methods and challenges in measuring the impact of national pneumococcal and rotavirus vaccine introduction on morbidity and mortality in Malawi. *Vaccine*. 2015;33(23):2637-45.
22. National Statistical Office/Malawi, ICF. Malawi Demographic and Health Survey 2015-16. Zomba, Malawi: National Statistical Office and ICF; 2017.
23. King C, Beard J, Crampin AC, Costello A, Mwansambo C, Cunliffe NA, et al. Methodological challenges in measuring vaccine effectiveness using population cohorts in low resource settings. *Vaccine*. 2015;33(38):4748-55.
24. Hartung C, Lerer A, Anokwa Y, Tseng C, Brunette W, Borriello G. Open data kit: tools to build information services for developing regions. Proceedings of the 4th ACM/IEEE International Conference on Information and Communication Technologies and Development; London, United Kingdom. 2369236: ACM; 2010. p. 1-12.
25. Verbal autopsy standards: the 2012 WHO verbal autopsy instrument [online]. Geneva; 2012.
26. BAIRAGI R, BLACK R, BLACKER J, BOERMA T, DALESSANDRO U, DAVID P, et al. MEASUREMENT OF OVERALL AND CAUSE-SPECIFIC MORTALITY IN INFANTS AND CHILDREN-MEMORANDUM FROM A WHO UNICEF MEETING (REPRINTED FROM BULLETIN DE L'ORGANISATION MONDIALE DE LA SANTE, VOL 72, PG 707-713, 1994). BULLETIN OF THE WORLD HEALTH ORGANIZATION. 1995;73(2):149-56.
27. Chandramohan D, Soleman N, Shibuya K, Porter J. Editorial: Ethical issues in the application of verbal autopsies in mortality surveillance systems. *Tropical Medicine & International Health*. 2005;10(11):1087-9.
28. Van Malderen C, Van Oyen H, Speybroeck N. Contributing determinants of overall and wealth-related inequality in under-5 mortality in 13 African countries. *Journal of Epidemiology and Community Health*. 2013;67(8):667-76.
29. Van Malderen C, Amouzou A, Barros AJD, Masquelier B, Van Oyen H, Speybroeck N. Socioeconomic factors contributing to under-five mortality in sub-Saharan Africa: a decomposition analysis. *BMC Public Health*. 2019;19(1):760.
30. Wijngaards-de Meij L, Stroebe M, Schut H, Stroebe W, van den Bout J, van der Heijden P, et al. Couples at Risk Following the Death of Their Child: Predictors of Grief Versus Depression. *Journal of Consulting and Clinical Psychology*. 2005;73(4):617-23.
31. Smith H, Asfaw AG, Aung KM, Chikoti L, Mgawadere F, d'Aquino L, et al. Implementing the WHO integrated tool to assess quality of care for mothers, newborns and children: results and lessons learnt from five districts in Malawi. *BMC Pregnancy and Childbirth*. 2017;17(1):271.
32. Chou VB, Walker N, Kanyangarara M. Estimating the global impact of poor quality of care on maternal and neonatal outcomes in 81 low- and middle-income countries: A modeling study. *PLoS medicine*. 2019;16(12):e1002990-e.
33. Vanclay F, Baines JT, Taylor CN. Principles for ethical research involving humans: ethical professional practice in impact assessment Part I. Impact Assessment and Project Appraisal. 2013;31(4):243-53.

Figure 1: Verbal autopsy inclusion (CONSORT diagram)

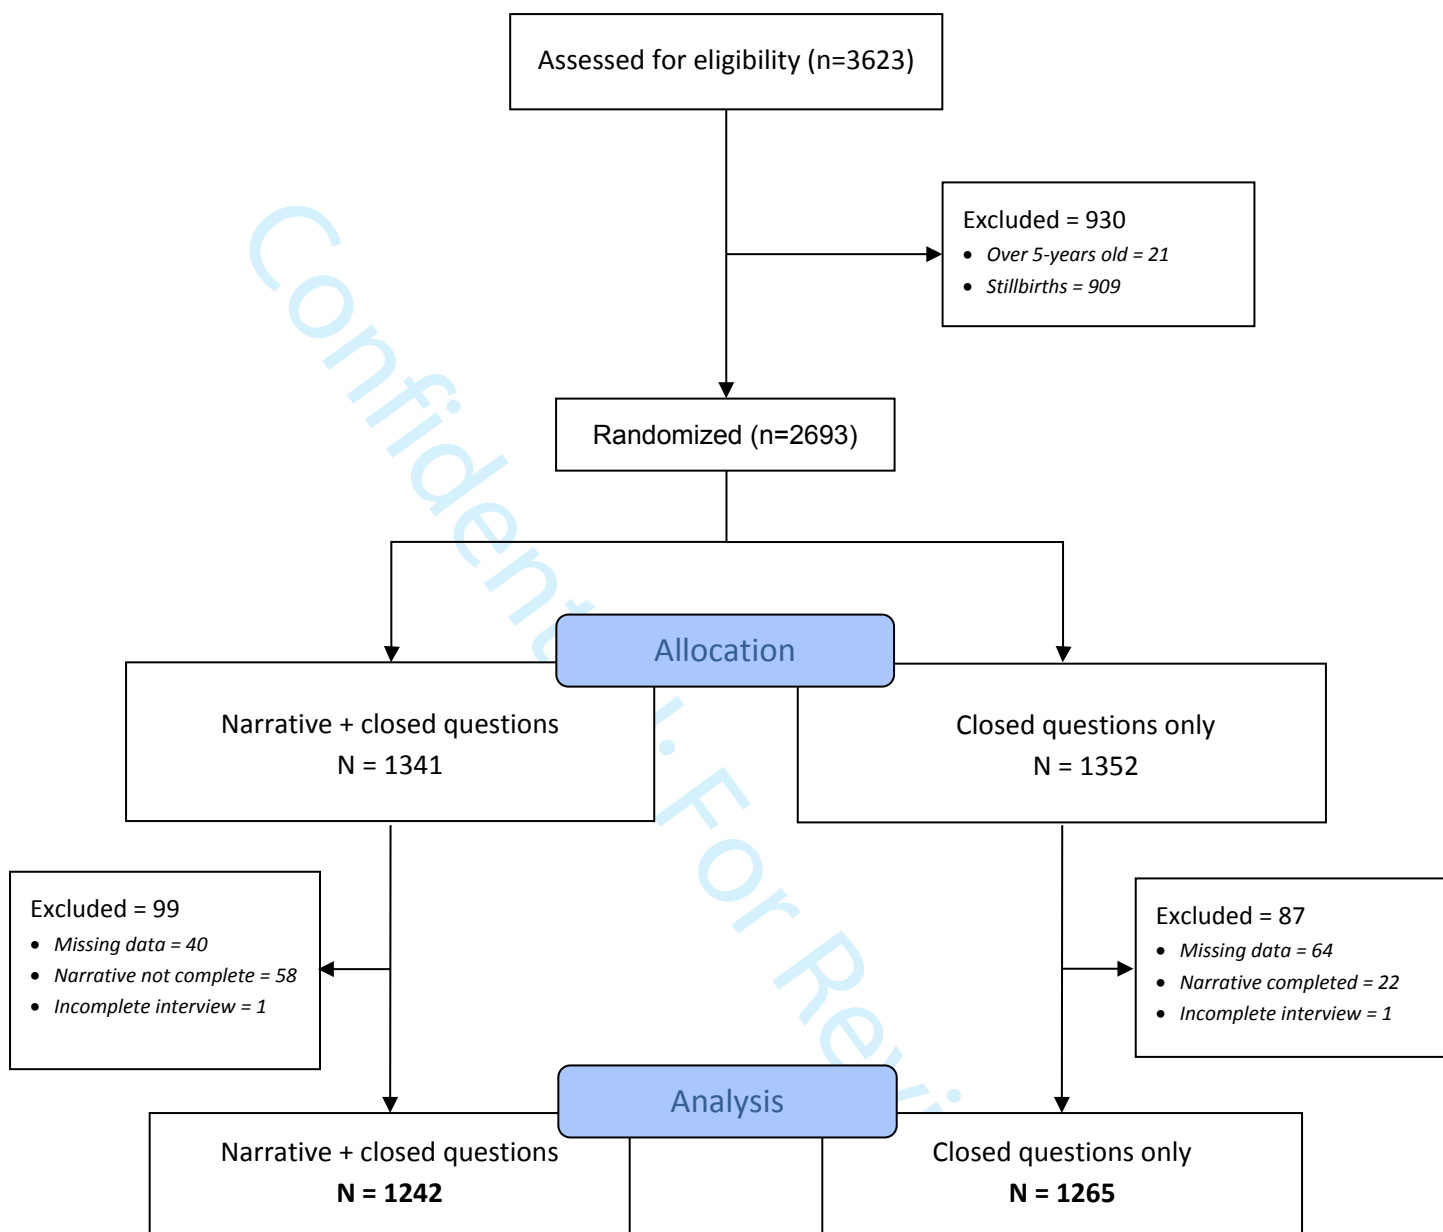

**Table 1:** Description of VA duration.

|                                           | No Narrative<br>N = 1265 | Narrative<br>N = 1242 | <i>p-value</i> |
|-------------------------------------------|--------------------------|-----------------------|----------------|
| <b>Total VA duration (Minutes)</b>        |                          |                       |                |
| < 10                                      | 259 (20.5%)              | 33 (2.7%)             |                |
| 11 – 20                                   | 663 (52.4%)              | 381 (30.7%)           |                |
| 21 – 30                                   | 252 (19.9%)              | 422 (34.0%)           |                |
| > 30                                      | 66 (5.2%)                | 401 (32.3%)           |                |
| Missing                                   | 25 (2.0%)                | 5 (0.4%)              | <0.001         |
| <b>Closed question duration (Minutes)</b> |                          |                       |                |
| Min – Max                                 | 6 – 134                  | 6 – 164               |                |
| Median (IQR)                              | 15.0 (9.7)               | 19.8 (9.9)            | <0.001         |
| <b>Narrative duration (Minutes)</b>       |                          |                       |                |
| Min – Max                                 |                          | 1 – 113               |                |
| Median (IQR)                              |                          | 7.0 (5.0)             |                |

**Table 2:** Description of respondent emotions and VA quality indicators, between interviews with and without open narratives.

|                                                                   | No Narrative<br>n (%) | Narrative<br>n (%) | Total<br>n (%) | <i>p-value</i> |
|-------------------------------------------------------------------|-----------------------|--------------------|----------------|----------------|
| <b>Respondent displayed visible emotion</b>                       |                       |                    |                |                |
| No                                                                | 1042 (82.4%)          | 990 (79.7%)        | 2032 (81.0%)   |                |
| Yes                                                               | 223 (17.6%)           | 252 (20.3%)        | 475 (19.0%)    | 0.089          |
| <b>*Type of emotion displayed during interview</b>                |                       |                    |                |                |
| Crying                                                            | 4 (1.8%)              | 12 (4.8%)          | 18 (3.4%)      |                |
| Long silence                                                      | 59 (26.5%)            | 68 (27.0%)         | 127 (26.7%)    |                |
| Other signs of emotion                                            | 160 (71.8%)           | 172 (68.2%)        | 332 (69.9%)    | 0.191          |
| <b>*Interview paused due to respondent becoming too emotional</b> |                       |                    |                |                |
| No                                                                | 89 (39.9%)            | 117 (46.4%)        | 206 (43.4%)    |                |
| Yes – Once                                                        | 31 (13.9%)            | 41 (16.3%)         | 72 (15.2%)     |                |
| Yes – More than once                                              | 103 (46.2%)           | 94 (37.3%)         | 197 (41.5%)    | 0.146          |
| <b>Respondent expressed desire to know the cause of death</b>     |                       |                    |                |                |
| No                                                                | 1235 (97.6%)          | 1216 (97.9%)       | 2451 (97.8%)   |                |
| Yes                                                               | 30 (2.4%)             | 26 (2.1%)          | 56 (2.2%)      | 0.638          |
| <b>Respondent suggested potential cause of death</b>              |                       |                    |                |                |
| No                                                                | 909 (71.9%)           | 890 (71.7%)        | 1799 (71.8%)   |                |
| Yes                                                               | 356 (28.1%)           | 352 (28.3%)        | 708 (28.2%)    | 0.912          |
| <b>Inter-VA able to assign cause of death</b>                     |                       |                    |                |                |
| Indeterminate                                                     | 77 (6.1%)             | 66 (5.3%)          | 143 (5.7%)     |                |
| Determinate                                                       | 1188 (93.9%)          | 1176 (94.7%)       | 2364 (94.3%)   | 0.404          |
| <b>Number of “Yes” responses to closed questions**</b>            |                       |                    |                |                |
|                                                                   | <b>Mean (SD)</b>      |                    |                |                |
| Neonates                                                          | 22.6 (5.3)            | 22.2 (5.3)         | 22.4 (5.3)     | 0.297          |
| Infants                                                           | 21.5 (6.8)            | 21.3 (7.3)         | 21.4 (7.0)     | 0.658          |
| Child                                                             | 22.2 (8.2)            | 21.3 (8.1)         | 21.8 (8.1)     | 0.122          |

\*Questions only asked for respondents who had a visible display of emotion (n=475)

\*\*Different numbers of questions are asked for different age groups

**Table 3:** Logistic regression exploring associations between respondent and child characteristics and emotions during VA.

| <i>Visible emotion due to open narrative</i> |                      |                   |         |
|----------------------------------------------|----------------------|-------------------|---------|
| Descriptors                                  |                      | aOR*<br>(95% CI)  | p-value |
| <b>Open narrative</b>                        | No                   | 1.00              |         |
|                                              | Yes                  | 1.20 (0.98, 1.47) | 0.084   |
| <b>Respondent</b>                            | Mother               | 1.00              |         |
|                                              | Father               | 0.72 (0.49, 1.07) | 0.102   |
|                                              | Grandparent          | 0.23 (0.13, 0.39) | <0.001  |
|                                              | Others               | 0.04 (0.01, 0.28) | 0.001   |
| <b>Child's age</b>                           | Neonate              | 1.00              |         |
|                                              | Infant               | 1.42 (1.09, 1.85) | 0.010   |
|                                              | Child under-5        | 1.21 (0.86, 1.69) | 0.274   |
| <b>Child's sex</b>                           | Male                 | 1.00              |         |
|                                              | Female               | 0.99 (0.80, 1.22) | 0.920   |
| <b>Location of death</b>                     | Home                 | 1.00              |         |
|                                              | Health centre        | 1.36 (1.04, 1.77) | 0.023   |
|                                              | MDH                  | 0.96 (0.72, 1.27) | 0.753   |
|                                              | En route to hospital | 1.49 (1.00, 2.22) | 0.049   |
|                                              | Other                | 0.38 (0.23, 0.64) | <0.001  |
| <b>Socio-economic status by tercile</b>      | Tercile 1 (Lowest)   | 1.00              |         |
|                                              | Tercile 2 (Middle)   | 1.52 (1.17, 1.97) | 0.002   |
|                                              | Tercile 3 (Highest)  | 1.49 (1.13, 1.95) | 0.004   |
| <b>Delay between death &amp; VA (Weeks)</b>  |                      | 0.98 (0.98, 0.99) | 0.002   |

\*All variables presented were included in the adjusted analysis

**Web-Appendix 1: Group discussion topic guide**

1. What is your experience of conducting verbal autopsies?
2. Can you describe the typical interview process?
3. Thinking specifically about interviews which DID NOT have an open narrative:
  - a. How did you establish a rapport with the respondents?
  - b. Did you feel the quality of the responses was accurate?
  - c. Were there any issues in conducting the interviews?
4. Now thinking specifically about the interviews which DID have an open narrative:
  - a. How did you establish a rapport with the respondents?
  - b. Did you feel the quality of the responses was accurate?
  - c. Were there any issues in conducting the interviews?
5. Overall, what were the biggest challenges in conducting the verbal autopsies?
6. Overall, did you feel there were any positive aspects of conducting these interviews?
7. Did you feel the open narrative improved the interview process for respondents? And for you? Why / Why not?
8. If you could recommend a best practice for conducting verbal autopsies, what would it be? Why?

## Web-Appendix 2: Comparison of randomised groups

|                                         | No Narrative<br>N = 1265 (51%) | Narrative<br>N = 1242 (49%) | Total<br>N = 2507 | <i>p-value</i> |
|-----------------------------------------|--------------------------------|-----------------------------|-------------------|----------------|
| <b>Respondent</b>                       |                                |                             |                   |                |
| Mother                                  | 985 (77.9%)                    | 946 (76.2%)                 | 1931 (77.0%)      |                |
| Father                                  | 95 (7.5%)                      | 105 (8.5%)                  | 200 (8.0%)        |                |
| Grandparent                             | 125 (9.9%)                     | 141 (11.4%)                 | 266 (10.6%)       |                |
| Other                                   | 60 (4.7%)                      | 50 (4.0%)                   | 110 (4.4%)        | 0.400          |
| <b>Socio-economic status by tercile</b> |                                |                             |                   |                |
| Tercile 1 (Lowest)                      | 408 (32.3%)                    | 430 (34.6%)                 | 838 (33.4%)       |                |
| Tercile 2 (Middle)                      | 459 (36.3%)                    | 420 (33.8%)                 | 879 (35.1%)       |                |
| Tercile 3 (Highest)                     | 398 (31.5%)                    | 392 (31.6%)                 | 790 (31.5%)       | 0.343          |
| <b>Child's age</b>                      |                                |                             |                   |                |
| Neonate                                 | 505 (39.9%)                    | 553 (44.5%)                 | 1058 (41.9%)      |                |
| Infant                                  | 352 (27.8%)                    | 302 (24.3%)                 | 654 (26.4%)       |                |
| Child under-5                           | 408 (32.3%)                    | 387 (31.2%)                 | 795 (31.7%)       | 0.042          |
| <b>Child's sex</b>                      |                                |                             |                   |                |
| Male                                    | 677 (53.5%)                    | 649 (52.3%)                 | 1326 (52.9%)      |                |
| Female                                  | 588 (46.5%)                    | 593 (47.8%)                 | 1181 (47.1%)      | 0.526          |
| <b>Location of death</b>                |                                |                             |                   |                |
| Home                                    | 408 (32.3%)                    | 389 (31.3%)                 | 797 (31.8%)       |                |
| Health centre                           | 327 (26.9%)                    | 325 (26.2%)                 | 652 (26.0%)       |                |
| MDH                                     | 297 (23.5%)                    | 319 (25.7%)                 | 616 (24.6%)       |                |
| En route to hospital                    | 78 (6.2%)                      | 103 (8.3%)                  | 181 (7.2%)        |                |
| Other                                   | 155 (12.3%)                    | 106 (8.5%)                  | 261 (10.4%)       | 0.008          |
|                                         | <b>Mean (SD)</b>               | <b>Mean (SD)</b>            |                   |                |
| Delay between death and VA (Weeks)      | 22.6 (15.5)                    | 22.5 (15.4)                 | 22.5 (15.5)       | 0.838          |



# BMJ Paediatrics Open

## The added value of an open narrative in verbal autopsies – a mixed-methods evaluation from Malawi

|                               |                                                                                                                                                                                                                                                                                                                                                                                                                                                                                                                                                                                                                                                     |
|-------------------------------|-----------------------------------------------------------------------------------------------------------------------------------------------------------------------------------------------------------------------------------------------------------------------------------------------------------------------------------------------------------------------------------------------------------------------------------------------------------------------------------------------------------------------------------------------------------------------------------------------------------------------------------------------------|
| Journal:                      | <i>BMJ Paediatrics Open</i>                                                                                                                                                                                                                                                                                                                                                                                                                                                                                                                                                                                                                         |
| Manuscript ID                 | bmjpo-2020-000961.R1                                                                                                                                                                                                                                                                                                                                                                                                                                                                                                                                                                                                                                |
| Article Type:                 | Original research                                                                                                                                                                                                                                                                                                                                                                                                                                                                                                                                                                                                                                   |
| Date Submitted by the Author: | 19-Jan-2021                                                                                                                                                                                                                                                                                                                                                                                                                                                                                                                                                                                                                                         |
| Complete List of Authors:     | Loh, Patricia; University College London, Institute for Global Health<br>Fottrell, Edward; University College London, Institute for Global Health<br>Beard, James; University College London, Institute for Global Health<br>Bar-Zeev, Naor; Malawi-Liverpool-Wellcome Trust Clinical Research Programme<br>Phiri, Tambosi; MaiMwana Project,<br>Banda, Masford; MaiMwana Project<br>Makwenda, Charles; Parent and Child Health Initiative<br>Bird, Jon; University of Bristol, Department of Computer Science<br>King, Carina; University College London, Institute for Global Health;<br>Karolinska Institute, Department of Global Public Health |
| Keywords:                     | Data Collection, Ethics, Mortality, Qualitative research                                                                                                                                                                                                                                                                                                                                                                                                                                                                                                                                                                                            |
|                               |                                                                                                                                                                                                                                                                                                                                                                                                                                                                                                                                                                                                                                                     |

SCHOLARONE™  
Manuscripts



I, the Submitting Author has the right to grant and does grant on behalf of all authors of the Work (as defined in the below author licence), an exclusive licence and/or a non-exclusive licence for contributions from authors who are: i) UK Crown employees; ii) where BMJ has agreed a CC-BY licence shall apply, and/or iii) in accordance with the terms applicable for US Federal Government officers or employees acting as part of their official duties; on a worldwide, perpetual, irrevocable, royalty-free basis to BMJ Publishing Group Ltd ("BMJ") its licensees and where the relevant Journal is co-owned by BMJ to the co-owners of the Journal, to publish the Work in this journal and any other BMJ products and to exploit all rights, as set out in our [licence](#).

The Submitting Author accepts and understands that any supply made under these terms is made by BMJ to the Submitting Author unless you are acting as an employee on behalf of your employer or a postgraduate student of an affiliated institution which is paying any applicable article publishing charge ("APC") for Open Access articles. Where the Submitting Author wishes to make the Work available on an Open Access basis (and intends to pay the relevant APC), the terms of reuse of such Open Access shall be governed by a Creative Commons licence – details of these licences and which [Creative Commons](#) licence will apply to this Work are set out in our licence referred to above.

Other than as permitted in any relevant BMJ Author's Self Archiving Policies, I confirm this Work has not been accepted for publication elsewhere, is not being considered for publication elsewhere and does not duplicate material already published. I confirm all authors consent to publication of this Work and authorise the granting of this licence.

1  
2  
3 1 **Title:** The added value of an open narrative in verbal autopsies – a mixed-methods evaluation from  
4 2 Malawi

5  
6 3 **Authors:** Patricia Loh<sup>1</sup>, Edward Fottrell<sup>1</sup>, James Beard<sup>1</sup>, Naor Bar-Zeev<sup>2,3</sup>, Tambosi Phiri<sup>4</sup>, Masford  
7 4 Banda<sup>4</sup>, Charles Makwenda<sup>4</sup>, Jon Bird<sup>5</sup>, Carina King<sup>1,6\*</sup>

8  
9  
10 5 **Affiliations:**

11  
12 6 1. Institute for Global Health, University College London, London, UK

13 7 2. Malawi Liverpool Wellcome Trust Clinical Research Programme, Blantyre, Malawi

14 8 3. International Vaccine Access Center, Department of International Health, Bloomberg School of  
15 9 Public Health, Johns Hopkins University, Baltimore MD, USA.

16 10 4. MaiMwana Project, Parent and Child Health Initiative, Lilongwe, Malawi

17 11 5. Department of Computer Science, University of Bristol, Bristol, UK

18 12 6. Department of Global Public Health, Karolinska Institutet, Stockholm, Sweden

19 13  
20 14 **\*Corresponding author:**

21 15 Institute for Global Health, University College London, 30 Guildford Street, London WC1N 1EH.

22 16 Email: [c.king@ucl.ac.uk](mailto:c.king@ucl.ac.uk)

23 17 **Word count:** 4,122  
24  
25  
26  
27  
28  
29  
30  
31  
32  
33  
34  
35  
36  
37  
38  
39  
40  
41  
42  
43  
44  
45  
46  
47  
48  
49  
50  
51  
52  
53  
54  
55  
56  
57  
58  
59  
60

1  
2  
3 18 **Abstract**  
4

5 19 **Background**  
6

7 20 The WHO standardised verbal autopsy (VA) instrument includes closed questions, ascertaining signs  
8 21 and symptoms of illness preceding death, and an optional open narrative. As VA analyses  
9 22 increasingly use automated algorithms, inclusion of narratives should be justified. We evaluated the  
10 23 role of open narratives on VA processes, data quality and respondent's emotional stress.  
11  
12

13 24 **Methods**  
14

15 25 A mixed-methods analysis was conducted using VA data for child deaths (0–59 months), between  
16 26 04/2013–11/2016 in Mchinji district, Malawi. Deaths were prospectively randomised to receive  
17 27 closed questions only or open narrative followed by closed questions. Upon concluding the VA,  
18 28 interviewers self-completed questions on respondents' emotional stress. Logistic regression was  
19 29 used to determine associations with visible emotional distress during VAs. A group discussion with  
20 30 interviewers was conducted at the project end, to understand field experiences and explore future  
21 31 recommendations; data were coded using deductive themes.  
22  
23  
24

25 32 **Results**  
26

27 33 2509 VAs were included, with 49.8% (n=1341) randomised to open narratives. Narratives lasted a  
28 34 median of 7 minutes (range: 1–113). Interviewers described improved rapport and felt narratives  
29 35 improved data quality, although there was no difference in the proportion of deaths with an  
30 36 indeterminate cause using an automated algorithm (5.3% vs. 6.1%). The majority of respondents did  
31 37 not display visible emotional stress (81%). Those with a narrative had higher, but not statistically  
32 38 significant, odds of emotional distress (aOR: 1.20; 95% CI: 0.98, 1.47). Factors associated with  
33 39 emotional stress were: infant deaths versus neonates; deaths at a health centre or en-route to  
34 40 hospital versus home; and higher socio-economic status. Non-parental respondents and increased  
35 41 time between death and interview were associated with lower odds of emotional distress.  
36  
37  
38

39 42 **Conclusion**  
40

41 43 Conducting an open narrative may help build rapport, something valued by the interviewers.  
42 44 However, additional time and emotional burdens should be further justified, with quality and utility  
43 45 of narratives promoted through standardised recommendations.  
44  
45  
46  
47  
48  
49  
50  
51  
52  
53  
54  
55  
56  
57  
58  
59  
60

1  
2  
3 48 **What is known about the topic**  
4

- 5 49 • Verbal autopsies are often conducted in contexts where civil registration systems are lacking  
6 or incomplete.  
7 50  
8 51 • There are several different tools for conducting these interviews, some containing an open  
9 narrative section, where respondents describe the events leading to a death in their own  
10 words.  
11 52  
12 53  
13 54 • Automated methods for analysing verbal autopsies often do not use the data from  
14 narratives and therefore there should be a clear and justified reason for conducting this  
15 section of the interview.  
16 56

17 57 **What this study adds**  
18

- 19 58 • Data collectors reported the narratives as a way to build rapport with the respondents, and  
20 felt this improved their ability to collect better quality information.  
21 59  
22 60 • While respondents mostly did not show visible signs of emotional stress during interviews,  
23 this was more frequent but statistically non-significant, in those with a narrative.  
24 61  
25 62 • There may be a trade-off in the increased time and emotional burden of verbal autopsies  
26 which contain a narrative section, with the ability to establish a connection between data  
27 collectors and respondents.  
28  
29  
30  
31  
32  
33  
34  
35  
36  
37  
38  
39  
40  
41  
42  
43  
44  
45  
46  
47  
48  
49  
50  
51  
52  
53  
54  
55  
56  
57  
58  
59  
60

## 65 Background

66 A comprehensive civil registration and vital statistics (CRVS) system recording births and deaths  
67 provides a country with essential information to make informed decisions for country-specific  
68 priority-setting, and measure its progress towards the Sustainable Development Goals (1, 2). In the  
69 absence of functional CRVS structures, verbal autopsies (VA) can partly fill this gap as an interim  
70 mortality data collection instrument by providing cause-specific mortality estimates (3-5). These  
71 data can be used by governments, healthcare providers, researchers, donors and policy makers, who  
72 rely on accurate and comparable data over time to estimate burdens of diseases at population level,  
73 evaluate program implementation and complement routine administrative data (1, 6). A recent  
74 review supported the use of VA to identify vulnerable groups and health needs for effective resource  
75 allocation in humanitarian settings (7).

76 The VA process involves trained fieldworkers identifying and interviewing an appropriate  
77 respondent, usually a close relative or caregiver, for a given death. Events preceding the death are  
78 recorded using a survey with a pre-determined set of closed questions, which can be supplemented  
79 by a free-text open narrative designed to elicit the story in the respondent's own words of how the  
80 death occurred (8). Following this, a suspected cause of death is generally assigned through  
81 physician review, or through the automated application of statistical algorithms (e.g. InterVA or  
82 SmartVA) (3-5).

83 In 2006, up to 18 VA tools with varying combinations of closed questions and open narratives were  
84 reportedly being used in 13 countries (9). The World Health Organization (WHO) published the first  
85 iteration of a standardised VA methodology in 2007, with subsequent updates in 2012, 2014 and  
86 2016 (8). The inclusion of an open narrative section remains recommended, but optional. The role of  
87 the narrative in physician-coded VAs has been likened to a medical history used by doctors to make  
88 diagnoses (10). It can also encourage interviewer-respondent rapport, providing respondents a more  
89 natural outlet to express themselves and recount events they feel were most relevant (11). The open  
90 narrative can also provide valuable information that standardised closed questions do not capture,  
91 such as cultural beliefs, adding context and holding authorities accountable to design interventions  
92 and services that are responsive to its people's needs (9, 12, 13). In contrast, it could be argued that  
93 such information could be better identified using structured social autopsy tools – a supplementary  
94 survey conducted specifically to identify non-medical causes of death (7, 14).

95 The emotional strain of a VA has been detailed in qualitative studies from Ghana,(15) Papua New  
96 Guinea,(16) and Nepal,(17) and fieldworkers from South Africa reported a higher likelihood of  
97 respondents becoming emotionally stressed during the open narrative compared to closed question  
98 sections of the interview (18). Furthermore, the potential for adverse effects of VA-induced distress  
99 on data quality, and the diagnostic influence this might have for assigning cause of death is  
100 important to understand (12, 19, 20).

101 This paper explores the role of the open narrative in the VA interview process, including its effects  
102 on procedures, data quality and emotional stress in respondents. Narratives potentially pose  
103 additional burdens on both respondents and interviewers, and as VAs are increasingly analysed  
104 using automated algorithms that do not use these free-text responses, their inclusion in the VA  
105 process should be justified.

106

## 107 **Methods**

108 We conducted a mixed-methods analysis of VA process data for deaths of children aged 0–59  
109 months collected prospectively from April 2013 to November 2016, as part of the VacSurv Study in  
110 Mchinji District, Malawi (21). Mchinji is a rural agricultural district in the central region of Malawi,  
111 with a population of approximately 600000, under-5 mortality rate of 63 per 1000 livebirths and  
112 crude birth rate of 32.2 at the time of data collection (22).

### 114 *Mortality Surveillance*

115 Full details of the population surveillance system used by the VacSurv Study have been previously  
116 described (21, 23). Briefly, deaths in children aged 0–59 months, including stillbirths, were registered  
117 retrospectively from October 2011 to February 2012, and prospectively from March 2012 to June  
118 2016. Births and deaths were reported by 1060 volunteer village informants who cumulatively  
119 covered the whole of Mchinji District, supervised by 50 enumerators and eight senior monitoring  
120 and evaluation officers (MEOs). Data were submitted using paper forms to the central office monthly  
121 where it was entered into a Microsoft Access database. Major errors in identification data (e.g.  
122 incompatible dates of birth and death) were sent back to the field for verification. All deaths in  
123 children under-5 years were extracted from the cleaned data, and pre-printed forms with a unique  
124 barcode containing the participant’s study ID were generated.

### 126 *Verbal Autopsies*

127 Deaths were prospectively randomised to one of two standard VA approaches: 1) closed questions  
128 only; or 2) open narrative followed by closed questions. Randomisation was programmed into the  
129 electronic data capture form (Open Data Kit software),(24) and the MEOs were informed of the  
130 allocation after the respondent had consented to the interview. The respondent was blinded to the  
131 randomisation procedure to minimise potential recall and volunteer biases, but MEOs were  
132 unblinded to the purpose of randomisation. The open narrative was unstructured and MEOs could  
133 choose how they recorded the details, such as audio-recording and subsequent transcription, notes  
134 or direct transcription of the story during the interview. The closed questions were WHO’s 2012 VA  
135 instrument,(25) translated into Chichewa.

### 137 *Data Collection*

138 The VAs were conducted at respondents’ homes by nine different MEOs. The MEOs were Malawian  
139 males, who resided in Mchinji district and had completed secondary education. Several hold  
140 diplomas in community mobilisation and social work. All had worked within the local communities  
141 for a minimum of five years before project commencement, and had conducted VAs previously. They  
142 underwent a one-week training, including: collective translation of the WHO VA questionnaire; study  
143 protocol including data collection using smartphones; developed Standard Operating Procedures  
144 (SOPs) for conducting the interviews sensitively; and supervised mock interviews.(12) The SOPs  
145 included identifying the main respondent, consent procedures, managing respondent distress and  
146 offering condolences.

1  
2  
3 147 At the end of each VA, MEOs self-completed post-interview questions. MEOs were asked to  
4 148 document the respondents present, emotional stress during the interview and whether the  
5 149 interview needed to be paused as a result. Total VA interview duration was automatically captured  
6 150 on the smartphone, and MEOs noted the start and end time of the open narrative on the paper  
7 151 form.

8  
9  
10 152 Closed questions were collected using ODK Collect on Android smartphones and narratives were  
11 153 submitted as written transcripts on the pre-printed forms. These were entered into a Microsoft  
12 154 Access database, and data were linked using the participants' study ID, then cleaned and processed.

13  
14 155

### 156 *Quantitative Analysis*

157 Child characteristics and VA process data were described with proportions, means and standard  
158 deviations (SD) for normally distributed continuous data or medians and interquartile ranges (IQR)  
159 for asymmetrically distributed data. Student's t- and chi<sup>2</sup> test were applied to the comparisons of  
160 process data between those with and without narratives.

161 Cause of death was assigned using InterVA-4 ([www.interva.net](http://www.interva.net)) based on closed question responses  
162 only; respondents had the option of answering with "yes", "no" or "don't know". InterVA uses a  
163 Bayesian model to assign the posterior probability of different causes of death based on positive  
164 ("yes") closed question responses only. The number of "yes" answers and subsequently the ability to  
165 assign probable cause of death were used as a proxy measure of data quality. Emotional distress and  
166 interview duration were chosen as proxy indicators of burden for respondents and interviewers.  
167 Stillbirths were excluded from the analysis as we used a locally modified VA tool for these deaths.  
168 The narratives were not used for assigning cause of death, and it was outside the scope of the study  
169 to validate or verify automated cause of death assignment.

170 The primary analysis was a per-protocol analysis (i.e. excluding interviews not conducted as  
171 allocated). This was chosen to examine the mechanism of narratives and the relationship to  
172 respondent distress, and not the process of recommending a narrative be done. We compared  
173 respondent emotional distress during the interview between those with and without a narrative. A  
174 multivariable logistic regression was conducted, adjusted for potential confounders defined *a priori*  
175 as: main respondent, child's age and sex, location of death and socio-economic tercile. All analyses  
176 were conducted with Stata 15.0.

177

### 178 *Qualitative Data Collection and Analysis*

179 At study completion, a group discussion was held with the MEOs who conducted VAs during the  
180 project to gather their feedback on the utility of the open narrative, their recommendations for  
181 future VA procedures and debrief on the emotional toll of administering VAs. . This group discussion  
182 was led by the technical advisor (CK) in a private room within the office using a structured topic  
183 guide (**Web-Appendix 1**). The discussion was conducted in English, audio-recorded and transcribed  
184 verbatim. The data was coded by CK using pen and paper, with pre-defined deductive themes using  
185 a thematic approach. The themes were based on the aim of the study: the interview process and  
186 procedures; perceived data quality; and emotional stress during VAs. The final interpretation was



187 shared with the MEOs, after triangulation with the quantitative analysis to check that it  
188 corresponded with their experiences.

189

### 190 *Patient and Public Involvement*

191 Prior to community VAs beginning, the overall VacSurv Study protocol was presented to the District  
192 Executive Committee and District Health Management team in Mchinji for input and approval.  
193 Extensive community engagement was conducted before data collection, and continued throughout  
194 the study, through village level key informant volunteers, area development committees and radio  
195 jingles. Community consent from traditional leaders was sought during study introduction.

196

### 197 *Ethics*

198 Verbal informed consent was obtained for all VA interviews, and written consent for the group  
199 discussion participants. The study was approved by the National Health Sciences Research Ethics  
200 Committee in Malawi [#837], London School of Hygiene and Tropical Medicine, UK [#6047] and  
201 Centers for Disease Control and Prevention, USA [#6268].

202

## 203 **Results**

204 A total of 3623 under-5 deaths were reported during the study period, and 2507 were included in  
205 the analysis (**Figure 1**). Overall, 50.2% (n=1352) were allocated to no narrative and 49.8% (n=1341)  
206 to have an open narrative, with 95% and 94% of VAs conducted per-protocol in each arm (Web-  
207 Appendix 2). Balance in the randomisation was achieved for respondent type, socio-economic  
208 status, child sex and time since the death. However more open narrative interviews were conducted  
209 for neonates (44.5% versus 39.9%,  $p$ -value=0.042) and location of death differed between the two  
210 groups (**Web-Appendix 3**). Of the deaths, 41.9% were neonates, 52.9% were male and 31.8%  
211 occurred at home (**Web-Appendix 3**). Primary respondents were mainly mothers (77.0%, n=1931),  
212 followed by grandparents (10.6%, n=266) and fathers (8.0%, n=200). The mean time between death  
213 and verbal autopsy was 22.5 weeks (range: 1–52 weeks). We present the quantitative and  
214 qualitative results together under the following themes: VA processes, data quality and emotional  
215 stress.

216

### 217 *VA Processes and Procedures*

218 Open narratives took a median of 7 minutes (range: 1–113 minutes) and closed questions took 17.5  
219 minutes (range: 6–164 minutes). Overall, interviews which included narratives took longer to  
220 complete, with 32.3% taking longer than 30 minutes compared to only 5.2% of those without a  
221 narrative ( $p$ -value < 0.001), with the accompanying closed questions correspondingly taking longer  
222 on average to complete (**Table 1**).

223 From the group discussion, MEOs reported narratives generally taking between 3 and 15 minutes. A  
224 key factor in the duration of these was the respondent and whether they were capable and willing to

225 respond. Respondents who were keen to relay their story were reported to do so without  
226 prompting, including in interviews randomised to not include a narrative. Conversely respondents  
227 who were hard to engage in interviews with a narrative were also reported.

228 *“My experience has been that after getting consent sometimes a respondent starts to recount before*  
229 *you ask, so you don’t interrupt, you just listen. But because your phone has asked you not to take an*  
230 *open history, you don’t take notes on that, you just go straight to the questions.” (MEO 8)*

231 *“And you can see that there were some open histories that were very short, maybe just 2 minutes*  
232 *[general agreement]. You just know that the respondent was not ready to give you information. It*  
233 *happened like that.” (MEO 2)*

234 However, in general the MEOs agreed that the main difference in interviews with and without open  
235 narratives was the time taken. Not taken into consideration in the quantitative measures of duration  
236 was the time to identify appropriate respondents before an interview could start. This could involve  
237 multiple visits to a respondent’s household before an appropriate respondent could be located (e.g.  
238 mother or father), or needing to gain community trust to access the respondent.

239 *“But some other times it may take even 10 minutes because these people know who you want to talk*  
240 *to you, but they are trying to shield them because they are not very sure at first what you’ve come to*  
241 *do.” (MEO 1)*

242 When asked what they would recommend as the best VA procedure, there was a consensus that  
243 both the open narrative and closed questions were important and should be included: *“The best way*  
244 *is the one which has the open history, that way you have the full explanation.” (MEO 7)*

245

#### 246 *Data Quality*

247 Based on InterVA analysis of closed questions, 94.3% of deaths had a cause of death assigned; there  
248 was no difference between those with and without an open narrative (94.7% versus 93.9%, *p*-  
249 value=0.404). Comparing the number of positive responses in the closed questions found no  
250 differences with a mean of 22.4, 21.4 and 21.8 “yes” answers for neonates, infant and child VA  
251 interviews (**Table 2**). The addition of the open narrative was not associated with respondents  
252 expressing a desire to know or suggest a potential cause of death.

253 There was consensus from the MEOs that data collected was of better quality when they conducted  
254 an open narrative. The first reason was that they effectively asked the questions twice, once as the  
255 narrative and then a second time in the closed questions, enabling them to cross-check responses.  
256 Secondly, MEOs reported respondents being more comfortable narrating a story than responding to  
257 “yes/no” questions. Finally, they reported the information gained during the narrative helped them  
258 navigate through the closed questions and probe respondents for details in a more directed fashion.

259

260 *“I have that feeling that, without the open history, the quality is compromised. Because it’s like the*  
261 *recall system, the set-up of the brain of the respondent, is disturbed by questions time and again.*  
262 *Unlike when he or she is free to express everything from her memory, it happens to be good quality*

263 *data [...] I think that open history gives a respondent a feeling that you are really concerned, because*  
 264 *you take a lot of time to listen to him or her.” (MEO 8)*

265 While only 28.2% of respondents were recorded as providing a cause of death (**Table 2**), the MEOs  
 266 noted that caregivers would often give a reason for their child’s death – especially if they had sought  
 267 care. However, they also noted that cause of death was not limited to medical reasons:

268 *“In their narrations, they will tell you the cause, ‘yes this baby was suffering from malaria, but we*  
 269 *think this baby died because they delayed in referring us to a health centre’. Maybe in the most*  
 270 *remote areas there was no ambulance, they were told to come to the [town] but the ambulance was*  
 271 *not available. They were told to look for their own transport to the [town]. So they will tell you those*  
 272 *ones as reasons, not the actual sickness of the baby.” (MEO 4)*

273

#### 274 *Emotional stress*

275 In the majority of interviews, respondents did not display visible signs of emotional distress (81%),  
 276 with similar proportions between those with and without an open narrative (79.7% versus 82.4%, *p*-  
 277 value=0.089). Of those who were recorded as showing signs of emotional distress, 3.4% cried, 26.7%  
 278 had a long silence and 69.9% exhibited other signs of emotional distress – over half of these  
 279 interviews needed to be paused once or more (**Table 2**).

280 **Table 3** shows the logistic regression for respondent emotional distress. While having an open  
 281 narrative was associated with 20% (aOR: 1.20; 95% CI: 0.98, 1.47) higher odds of the respondent  
 282 becoming emotionally distressed during the interview; this was not statistically significant but may  
 283 be pragmatically relevant. Factors associated with lower odds of becoming emotionally stressed  
 284 during the VA interview included: non-parental respondents and increased time between the death  
 285 and interview (2% lower odds for each week passed). Factors associated with increased odds of  
 286 visible signs of emotional stress include: deaths amongst infants compared to neonates (aOR: 1.42;  
 287 95% CI: 1.09, 1.85); the death occurring at a health centre (aOR: 1.36; 95% CI: 1.04, 1.77) or en route  
 288 to hospital (aOR: 1.49; 95% CI: 1.00, 2.22); and being in the middle (aOR 1.52; 95% CI: 1.17, 1.97) or  
 289 highest wealth tercile (aOR: 1.49; 95% CI: 1.13, 1.95).

290 Respondents’ emotional stress was not directly raised by the MEOs during the discussion; however,  
 291 they noted a key challenge in conducting the VAs as being unable to help respondents or feeling  
 292 hopeless when respondents related their stories. They raised specific examples around HIV positive  
 293 respondents seeking advice or requests for referrals of malnourished children to NGO programmes.

294 *“A challenge, in a nut shell, was not being able assist where questions were raised. You have raised*  
 295 *questions to them. In the end they raise questions to you, that need action, for you to not be able to*  
 296 *do anything. That was a big challenge and a let-down.” (MEO 4)*

297 The MEOs indicated that the VA process is similarly distressing for the interviewer, with many of the  
 298 MEOs also having families and young children which can relate to the narrative.

299 *“The verbal autopsies are not easy to be carried as they involve or concern somebody who has lost*  
 300 *life, so it’s always emotional between the interviewer and the interviewee” (MEO 2)*

301

302 **Discussion**

303 Using a mixed-methods analysis of VA process data amongst children under-five in Malawi, we  
304 explored the role of open narratives on the interview process, data quality and respondents'  
305 emotional stress. As expected, free-text narratives increased the duration of the VA interview but  
306 did not impact on the ability of a Bayesian algorithm to assign a cause of death - the proxy we used  
307 for data quality. The interviewers considered the open narrative useful in building rapport with  
308 respondents, agreeing with previously reported experiences,(11, 26) and believed it subsequently  
309 improved the VA data. However, respondents with an open narrative displayed emotional distress  
310 more frequently when compared to those without, even if visible relatively uncommon. While it was  
311 outside the scope of this study, further work is warranted from the respondent perspective; in  
312 particular, whether they value the space to narrate their stories, and how this balances with the  
313 emotional burden.

314 Although previous studies have observed VA-induced emotional stress amongst respondents,(16-18,  
315 27) exploring characteristics of both the respondent and deceased showed interesting associations  
316 with emotional distress. Firstly, infant death was associated with increased emotional stress during  
317 VA compared to neonatal deaths. Grief is influenced by cultural constructs, and here cultural  
318 perceptions of child 'maturity' may be important. Studies from Tanzania and Ghana both point to  
319 norms around concealing mourning for young infants, in particular pregnancy loss (28, 29).  
320 Respondents from the higher socio-economic group had lower odds of observed emotional stress.  
321 Under-five deaths are more frequent amongst lower socio-economic households;(30) with an under-  
322 five mortality of 52/1000 livebirths in the highest wealth group, compared to 69/1000 in middle and  
323 low wealth groups in Malawi (31). The 'unexpectedness' of deaths amongst children has been  
324 associated with increased parental grief previously (32); and a study from South Africa reported that  
325 pressures of poverty can overshadow the grieving process (33). More understanding on how local  
326 contexts and mourning processes can affect the VA procedure, would be valuable.

327 We observed that deaths occurring at health centres or en route to hospital were associated with  
328 increased emotional stress. This may reflect respondents' perception or experience of poor quality  
329 of care, resulting in frustrations at system failures and delays in referrals and receiving care. This was  
330 echoed by the MEOs, and prior data from this setting,(12) who described respondents attributing  
331 deaths to non-medical causes. Deficiencies in Malawian healthcare facilities' ability to deliver quality  
332 maternal, newborn and child care have been reported,(34) and modelled estimates suggest that  
333 poor quality maternal and newborn care result in considerable preventable mortality (35). Caregiver  
334 frustration with healthcare provision and challenges in reaching referral facilities is therefore  
335 understandable.

336 Although the MEOs perceived better rapport and improved data quality from VAs with open  
337 narratives, we did not observe any differences in the number of "yes" responses and the subsequent  
338 proportion of VAs with an assigned cause of death. Earlier findings from Malawi showed limited  
339 advantage in including unstructured open narratives to assign cause of death. (12) While in this case  
340 it is hard to know whether individual answers would have been different, comparing cause of death  
341 distributions between those with and without narratives found no clear differences (data not  
342 shown), suggesting this was not the case. The added diagnostic value of free-text narratives has

1  
2  
3 343 been examined previously (19), and found that the addition of the narrative did not explain  
4 344 discrepancies in diagnoses between physician and InterVA analyses. This could be due to narratives  
5 345 capturing indicators which are already included in closed questions. A key principle in research ethics  
6 346 is to avoid intrusions;(36) therefore, if narrative data is not intended for analysis and does not  
7 347 appear to have any influence on data quality, documenting these data may pose an unnecessary  
8 348 burden.

9  
10  
11 349 The main limitation of our study was our reliance on interviewer-observed signs of respondent  
12 350 emotion. The MEO self-completed post-VA questionnaire may have suffered from the subjective  
13 351 nature of expression and interpretation of emotion, and cultural norms of private bereavement.  
14 352 Grief after the death of an infant has also been described as a non-linear process, and influenced by  
15 353 gender (37). Including questions on both respondent-reported and interviewer self-reported  
16 354 emotional stress would have provided richer information. The MEOs also reported being upset by  
17 355 the VA interviews. A study from Mexico has developed a containment strategy to support the  
18 356 emotional health of data collectors conducting VAs, and going forward this should be considered  
19 357 (38).

20  
21  
22  
23  
24 358 It has been reported that women can face stigma and blame in child deaths (39). The power  
25 359 imbalance and gendered interviewer-interviewee dynamics present in this study may therefore have  
26 360 influenced mothers' emotional stress and willingness to freely discuss their child's death. These  
27 361 dynamics may also be present when multiple respondents were interviewed together e.g. a husband  
28 362 and wife. While we allowed the main respondent to decide who else was present for the VA, women  
29 363 may not have been empowered to exclude others from the process. The project conducted  
30 364 extensive community sensitisation through working with village leaders and key informants to gain  
31 365 respondent trust. However, the MEOs being local residents may also have inadvertently affected  
32 366 this, as Haws et. al, found interviewers from outside the community with good cultural insights may  
33 367 be more be trusted (29).

34  
35  
36  
37  
38 368 It is likely that undocumented protocol violations occurred, as MEOs reported respondents being  
39 369 unwilling or unable to fully engage in the open narrative, and conversely narrating the story of their  
40 370 child's death without prompt. This is not unlike the reluctance observed in VA respondents in rural  
41 371 Ghana who occasionally denied interviews due to grief (15). While we planned a per-protocol  
42 372 analysis, we were unable to fully adjust for these violations in the quantitative analysis, and our  
43 373 results may therefore more closely reflect intention-to-treat. Finally, the group discussion with the  
44 374 MEOs was led by the technical advisor, possibly leading to social-desirability bias limiting their  
45 375 willingness to highlight concerns or deviations from the protocol.

46  
47  
48  
49 376

## 50 51 377 **Conclusion**

52  
53 378 Evidence from this large-scale evaluation suggests that open narratives do not affect the ability of an  
54 379 automated algorithm to assign a cause of death, but play a valued role in establishing interviewer-  
55 380 interviewee rapport. From the interviewer perspective, good rapport as a result of conducting an  
56 381 open narrative at the start of the VA may outweigh the additional time burden and the slight  
57 382 increase in emotional stress amongst respondents. Any undue burden associated with having an  
58 383 open narrative would be further justified if the quality and utility of information can be guaranteed.

1  
2  
3  
4  
5  
6  
7  
8  
9  
10  
11  
12  
13  
14  
15  
16  
17  
18  
19  
20  
21  
22  
23  
24  
25  
26  
27  
28  
29  
30  
31  
32  
33  
34  
35  
36  
37  
38  
39  
40  
41  
42  
43  
44  
45  
46  
47  
48  
49  
50  
51  
52  
53  
54  
55  
56  
57  
58  
59  
60

384 We would therefore recommend guidance from leading bodies, such as the WHO VA Reference  
385 Group, for a more standardised approach to record and analyse free-text narratives. This is with a  
386 view to reducing bias introduced by those involved during the VA process, but should also take into  
387 account respondent perspective and preferences. We would also support longer waiting periods  
388 between death and time of interview, so long as accurate recall is not negatively impacted, and the  
389 inclusion of wider non-parental family members to reduce the emotional burdens associated with  
390 the sensitive nature of discussing death.

391  
392  
393

Confidential: For Review Only

1  
2  
3 394 **Declarations**  
4

5 395 *Ethics approval and consent to participate*  
6

7 396 The study was approved by the National Health Sciences Research Ethics Committee in Malawi  
8 397 [#837], London School of Hygiene and Tropical Medicine, UK [#6047] and Centers for Disease Control  
9 398 and Prevention, USA [#6268]. Verbal informed consent was sought from respondents prior to  
10 399 starting the verbal autopsy interviews. Consent was documented in the electronic data capture  
11 400 form.  
12  
13

14 401

15  
16 402 *Consent for publication*  
17

18 403 Not applicable.  
19

20 404

21  
22 405 *Availability of data and materials*  
23

24 406 Fully anonymised quantitative and qualitative datasets generated and analysed for the purpose of  
25 407 this study are available from the corresponding author, Dr. Carina King ([c.king@ucl.ac.uk](mailto:c.king@ucl.ac.uk)) on  
26 408 reasonable request for research purposes only, following approval from the National Health Sciences  
27 409 Research Ethics Committee in Malawi, and study Principal Investigators.  
28  
29

30 410

31  
32 411 *Competing interests*  
33

34 412 The authors declare that they have no competing interests.  
35  
36

37 413

38  
39 414 *Funding*  
40

41 415 This VacSurv Project was funded by a Wellcome Trust Programme Grant (WT091909/B/10/Z) to Neil  
42 416 French, Nigel Cunliffe, Rob Heyderman; an investigator-initiated grant by GlaxoSmithKline Biologicals  
43 417 to Nigel Cunliffe, NBZ, Neil French; a Wellcome Trust Strategic Award to Anthony Costello (Number:  
44 418 085417ma/Z/08/Z); and MLW core grant strategic award to Rob Heyderman.  
45  
46

47 419

48  
49 420  
50  
51  
52  
53  
54  
55  
56  
57  
58  
59  
60

1  
2  
3 421 **Author contributions**  
4

5 422 This study was conceived by PL, EF and CK, based on data from a larger research question conceived  
6 423 by NBZ, BJB, JB, EF and CK. The data was collected under the oversight of TP, CM, and MB. The  
7 424 quantitative data was analysed by PL and the qualitative data was coded and analysed by CK. The  
8 425 manuscript was written by PL, with significant input from CK. All authors read, commented and  
9 426 approved the manuscript.  
10  
11

12 427  
13

14 428 **Acknowledgments**  
15

16 429 We would like to thank the communities and families participating in the study, the key informants  
17 430 for volunteering their time and the Traditional Authorities of Mchinji district and Chilumba, Karonga  
18 431 district for their support. We are very grateful for the hard work of our field and data staff. We  
19 432 thank the other VacSurv Consortium members: Neil French and Nigel Cunliffe (University of  
20 433 Liverpool); Rob Heydermann and Anthony Costello (University College London); Amelia Crampin  
21 434 (University of Glasgow); Osamu Nakagomi (University of Nagasaki); Jacqueline E. Tate and Umesh D.  
22 435 Parashar (Centers for Disease Control & Prevention, Atlanta, GA, USA). The findings and conclusions  
23 436 in this report are those of the authors and do not necessarily represent the official position of the US  
24 437 Centers for Disease Control and Prevention.  
25  
26  
27  
28

29 438  
30

31 439  
32  
33  
34  
35  
36  
37  
38  
39  
40  
41  
42  
43  
44  
45  
46  
47  
48  
49  
50  
51  
52  
53  
54  
55  
56  
57  
58  
59  
60



440 **References**

- 441 1. Thomas LM, D'Ambruoso L, Balabanova D. Verbal autopsy in health policy and systems: a  
442 literature review. *BMJ Glob Health*. 2018;3(2):e000639.
- 443 2. World health statistics 2018: monitoring health for the SDGs, sustainable development  
444 goals. Geneva; 2018.
- 445 3. D'Ambruoso L, Kahn K, Wagner RG, Twine R, Spies B, van der Merwe M, et al. Moving from  
446 medical to health systems classifications of deaths: extending verbal autopsy to collect information  
447 on the circumstances of mortality. *Glob Health Res Policy*. 2016;1:2.
- 448 4. Fottrell E, Byass P. Verbal Autopsy: Methods in Transition. *Epidemiologic Reviews*.  
449 2010;32(1):38-55.
- 450 5. Murray CJL, Lozano R, Flaxman AD, Serina P, Phillips D, Stewart A, et al. Using verbal autopsy  
451 to measure causes of death: the comparative performance of existing methods. *BMC Medicine*.  
452 2014;12(1):5.
- 453 6. AbouZahr C. Verbal autopsy: who needs it? *Population Health Metrics*. 2011;9(1):19.
- 454 7. Thomas LM, D'Ambruoso L, Balabanova D. Use of verbal autopsy and social autopsy in  
455 humanitarian crises. *BMJ Glob Health*. 2018;3(3):e000640.
- 456 8. Verbal autopsy standards: the 2016 WHO verbal autopsy instrument [online]. 2017.
- 457 9. Soleman N, Chandramohan D, Shibuya K. Verbal autopsy: current practices and challenges.  
458 *Bulletin of the World Health Organization*. 2006;84(3):239 - 45.
- 459 10. Reeves BC, Quigley M. A review of data-derived methods for assigning causes of death from  
460 verbal autopsy data. *International Journal of Epidemiology*. 1997;26(5):1080-9.
- 461 11. Lerer LB, Butchart A, Blanche MT. 'A bothersome death'—Narrative accounts of infant  
462 mortality in Cape Town, South Africa. *Social Science & Medicine*. 1995;40(7):945-53.
- 463 12. King C, Zamawe C, Banda M, Bar-Zeev N, Beard J, Bird J, et al. The quality and diagnostic  
464 value of open narratives in verbal autopsy: a mixed-methods analysis of partnered interviews from  
465 Malawi. *BMC Medical Research Methodology*. 2016;16(1):13.
- 466 13. Gouda HN, Flaxman AD, Brolan CE, Joshi R, Riley ID, AbouZahr C, et al. New challenges for  
467 verbal autopsy: Considering the ethical and social implications of verbal autopsy methods in routine  
468 health information systems. *Soc Sci Med*. 2017;184:65-74.
- 469 14. Moyer CA, Johnson C, Kaselitz E, Aborigo R. Using social autopsy to understand maternal,  
470 newborn, and child mortality in low-resource settings: a systematic review of the literature. *Glob  
471 Health Action*. 2017;10(1):1413917.
- 472 15. Aborigo RA, Allotey P, Tindana P, Azongo D, Debpuur C. Cultural imperatives and the ethics  
473 of verbal autopsies in rural Ghana. *Global Health Action*. 2013;6(1):18570.
- 474 16. Gouda HN, Kelly-Hanku A, Wilson L, Maraga S, Riley ID. "Whenever they cry, I cry with  
475 them": Reciprocal relationships and the role of ethics in a verbal autopsy study in Papua New  
476 Guinea. *Soc Sci Med*. 2016;163:1-9.
- 477 17. Morrison J, Fottrell E, Budhatokhi B, Bird J, Basnet M, Manandhar M, et al. Applying a Public  
478 Health Ethics Framework to Consider Scaled-Up Verbal Autopsy and Verbal Autopsy with Immediate  
479 Disclosure of Cause of Death in Rural Nepal. *Public Health Ethics*. 2018;11(3):293-310.
- 480 18. Bird J, Byass P, Kahn K, Mee P, Fottrell E. A matter of life and death: practical and ethical  
481 constraints in the development of a mobile verbal autopsy tool. *Proceedings of the SIGCHI  
482 Conference on Human Factors in Computing Systems; Paris, France: Association for Computing  
483 Machinery; 2013. p. 1489–98.*
- 484 19. Rankin JC, Lorenz E, Neuhaan F, Yé M, Sié A, Becher H, et al. Exploring the role narrative  
485 free-text plays in discrepancies between physician coding and the InterVA regarding determination  
486 of malaria as cause of death, in a malaria holo-endemic region. *Malaria Journal*. 2012;11(1):51.
- 487 20. Joshi R, Praveen D, Chow C, Neal B. Effects on the estimated cause-specific mortality fraction  
488 of providing physician reviewers with different formats of verbal autopsy data. *Population Health  
489 Metrics*. 2011;9(1):33.

- 1  
2  
3 490 21. Bar-Zeev N, Kapanda L, King C, Beard J, Phiri T, Mvula H, et al. Methods and challenges in  
4 491 measuring the impact of national pneumococcal and rotavirus vaccine introduction on morbidity and  
5 492 mortality in Malawi. *Vaccine*. 2015;33(23):2637-45.
- 6 493 22. National Statistical Office/Malawi, ICF. Malawi Demographic and Health Survey 2015-16.  
7 494 Zomba, Malawi: National Statistical Office and ICF; 2017.
- 8 495 23. King C, Beard J, Crampin AC, Costello A, Mwansambo C, Cunliffe NA, et al. Methodological  
9 496 challenges in measuring vaccine effectiveness using population cohorts in low resource settings.  
10 497 *Vaccine*. 2015;33(38):4748-55.
- 11 498 24. Hartung C, Lerer A, Anokwa Y, Tseng C, Brunette W, Borriello G. Open data kit: tools to build  
12 499 information services for developing regions. Proceedings of the 4th ACM/IEEE International  
13 500 Conference on Information and Communication Technologies and Development; London, United  
14 501 Kingdom. 2369236: ACM; 2010. p. 1-12.
- 15 502 25. Verbal autopsy standards: the 2012 WHO verbal autopsy instrument [online]. Geneva; 2012.
- 16 503 26. BAIRAGI R, BLACK R, BLACKER J, BOERMA T, DALESSANDRO U, DAVID P, et al.  
17 504 MEASUREMENT OF OVERALL AND CAUSE-SPECIFIC MORTALITY IN INFANTS AND CHILDREN-  
18 505 MEMORANDUM FROM A WHO UNICEF MEETING (REPRINTED FROM BULLETIN DE L'ORGANISATION  
19 506 MONDIALE DE LA SANTE, VOL 72, PG 707-713, 1994). BULLETIN OF THE WORLD HEALTH  
20 507 ORGANIZATION. 1995;73(2):149-56.
- 21 508 27. Chandramohan D, Soleman N, Shibuya K, Porter J. Editorial: Ethical issues in the application  
22 509 of verbal autopsies in mortality surveillance systems. *Tropical Medicine & International Health*.  
23 510 2005;10(11):1087-9.
- 24 511 28. Meyer AC, Opoku C, Gold KJ. "They Say I Should not Think About It:": A Qualitative Study  
25 512 Exploring the Experience of Infant Loss for Bereaved Mothers in Kumasi, Ghana. *Omega (Westport)*.  
26 513 2018;77(3):267-79.
- 27 514 29. Haws RA, Mashasi I, Mrisho M, Schellenberg JA, Darmstadt GL, Winch PJ. "These are not  
28 515 good things for other people to know": how rural Tanzanian women's experiences of pregnancy loss  
29 516 and early neonatal death may impact survey data quality. *Soc Sci Med*. 2010;71(10):1764-72.
- 30 517 30. Van Malderen C, Van Oyen H, Speybroeck N. Contributing determinants of overall and  
31 518 wealth-related inequality in under-5 mortality in 13 African countries. *Journal of Epidemiology and  
32 519 Community Health*. 2013;67(8):667-76.
- 33 520 31. Van Malderen C, Amouzou A, Barros AJD, Masquelier B, Van Oyen H, Speybroeck N.  
34 521 Socioeconomic factors contributing to under-five mortality in sub-Saharan Africa: a decomposition  
35 522 analysis. *BMC Public Health*. 2019;19(1):760.
- 36 523 32. Wijngaards-de Meij L, Stroebe M, Schut H, Stroebe W, van den Bout J, van der Heijden P, et  
37 524 al. Couples at Risk Following the Death of Their Child: Predictors of Grief Versus Depression. *Journal  
38 525 of Consulting and Clinical Psychology*. 2005;73(4):617-23.
- 39 526 33. Demmer C. Experiences of women who have lost young children to AIDS in KwaZulu-Natal,  
40 527 South Africa: a qualitative study. *Journal of the International AIDS Society*. 2010;13(1):50.
- 41 528 34. Smith H, Asfaw AG, Aung KM, Chikoti L, Mgawadere F, d'Aquino L, et al. Implementing the  
42 529 WHO integrated tool to assess quality of care for mothers, newborns and children: results and  
43 530 lessons learnt from five districts in Malawi. *BMC Pregnancy and Childbirth*. 2017;17(1):271.
- 44 531 35. Chou VB, Walker N, Kanyangarara M. Estimating the global impact of poor quality of care on  
45 532 maternal and neonatal outcomes in 81 low- and middle-income countries: A modeling study. *PLoS  
46 533 medicine*. 2019;16(12):e1002990-e.
- 47 534 36. Vanclay F, Baines JT, Taylor CN. Principles for ethical research involving humans: ethical  
48 535 professional practice in impact assessment Part I. *Impact Assessment and Project Appraisal*.  
49 536 2013;31(4):243-53.
- 50 537 37. Wing DG, Burge-Callaway K, Rose Clance P, Armistead L. Understanding gender differences  
51 538 in bereavement following the death of an infant: Implications of or treatment. *Psychotherapy:  
52 539 Theory, Research, Practice, Training*. 2001;38(1):60-73.
- 53  
54  
55  
56  
57  
58  
59  
60

- 1  
2  
3 540 38. Treviño-Siller S, Ramírez-Villalobos D, Sanchez-Dominguez MS, Hernández Prado B. How to  
4 541 deal with the suffering: Utility of an emotional containment strategy to collect data for verbal  
5 542 autopsies in Mexico. *Death Studies*. 2020;1-6.  
6  
7 543 39. McNeil MJ, Namisango E, Hunt J, Powell RA, Baker JN. Grief and Bereavement in Parents  
8 544 After the Death of a Child in Low- and Middle-Income Countries. *Children*. 2020;7(5):39.  
9  
10 545  
11  
12 546

Confidential: For Review Only

547 **Figure 1:** Verbal autopsy inclusion (CONSORT diagram)

548 **Table 1:** Description of VA duration.

|                                            | No Narrative<br>N = 1265 | Narrative<br>N = 1242 | <i>p-value</i> |
|--------------------------------------------|--------------------------|-----------------------|----------------|
| <b>Total VA duration (Minutes)</b>         |                          |                       |                |
| < 10                                       | 259 (20.5%)              | 33 (2.7%)             |                |
| 11 – 20                                    | 663 (52.4%)              | 381 (30.7)            |                |
| 21 – 30                                    | 252 (19.9%)              | 422 (34.0%)           |                |
| > 30                                       | 66 (5.2%)                | 401 (32.3%)           |                |
| Missing                                    | 25 (2.0%)                | 5 (0.4%)              | <0.001         |
| <b>Closed question duration (Minutes)*</b> |                          |                       |                |
| Min – Max                                  | 6 – 134                  | 6 – 164               |                |
| Median (IQR)                               | 15.0 (9.7)               | 19.8 (9.9)            | <0.001         |
| <b>Narrative duration (Minutes)</b>        |                          |                       |                |
| Min – Max                                  |                          | 1 – 113               |                |
| Median (IQR)                               |                          | 7.0 (5.0)             |                |

549

550 \*The duration included pauses in the interview; MEOs were instructed to allow at least 30 minutes if the  
 551 respondent needed to pause the interview before attempting to reschedule. Note, only 17 (0.7%) interviews  
 552 took longer than 60 minutes.

553

554 **Table 2:** Description of respondent emotional stress and VA quality indicators, between interviews  
 555 with and without open narratives.

|                                                                            | No Narrative<br>n (%) | Narrative<br>n (%) | Total<br>n (%) | <i>p-value</i> |
|----------------------------------------------------------------------------|-----------------------|--------------------|----------------|----------------|
| <b>Respondent displayed visible emotional distress</b>                     |                       |                    |                |                |
| No                                                                         | 1042 (82.4%)          | 990 (79.7%)        | 2032 (81.0%)   |                |
| Yes                                                                        | 223 (17.6%)           | 252 (20.3%)        | 475 (19.0%)    | 0.089          |
| <b>*Type of emotional distress displayed during interview</b>              |                       |                    |                |                |
| Crying                                                                     | 4 (1.8%)              | 12 (4.8%)          | 18 (3.4%)      |                |
| Long silence                                                               | 59 (26.5%)            | 68 (27.0%)         | 127 (26.7%)    |                |
| Other signs of emotional distress                                          | 160 (71.8%)           | 172 (68.2%)        | 332 (69.9%)    | 0.191          |
| <b>*Interview paused due to respondent becoming emotionally distressed</b> |                       |                    |                |                |
| No                                                                         | 89 (39.9%)            | 117 (46.4%)        | 206 (43.4%)    |                |
| Yes – Once                                                                 | 31 (13.9%)            | 41 (16.3%)         | 72 (15.2%)     |                |
| Yes – More than once                                                       | 103 (46.2%)           | 94 (37.3%)         | 197 (41.5%)    | 0.146          |
| <b>Respondent expressed desire to know the cause of death</b>              |                       |                    |                |                |
| No                                                                         | 1235 (97.6%)          | 1216 (97.9%)       | 2451 (97.8%)   |                |
| Yes                                                                        | 30 (2.4%)             | 26 (2.1%)          | 56 (2.2%)      | 0.638          |
| <b>Respondent suggested potential cause of death</b>                       |                       |                    |                |                |
| No                                                                         | 909 (71.9%)           | 890 (71.7%)        | 1799 (71.8%)   |                |
| Yes                                                                        | 356 (28.1%)           | 352 (28.3%)        | 708 (28.2%)    | 0.912          |
| <b>Inter-VA able to assign cause of death</b>                              |                       |                    |                |                |
| Indeterminate                                                              | 77 (6.1%)             | 66 (5.3%)          | 143 (5.7%)     |                |
| Determinate                                                                | 1188 (93.9%)          | 1176 (94.7%)       | 2364 (94.3%)   | 0.404          |
| <b>Number of “Yes” responses to closed questions**</b>                     |                       |                    |                |                |
| Neonates                                                                   | 22.6 (5.3)            | 22.2 (5.3)         | 22.4 (5.3)     | 0.297          |
| Infants                                                                    | 21.5 (6.8)            | 21.3 (7.3)         | 21.4 (7.0)     | 0.658          |
| Child                                                                      | 22.2 (8.2)            | 21.3 (8.1)         | 21.8 (8.1)     | 0.122          |

556 \*Questions only asked for respondents who had a visible display of emotional distress (n=475); “other” was  
 557 not further specified, but informal feedback from MEOs reported examples of distress seen in facial  
 558 expressions and body language.

559 \*\*Different numbers of questions are asked for different age groups

560

561

562 **Table 3:** Logistic regression exploring associations between respondent and child characteristics and  
 563 emotional distress during VA.

| <i>Visible emotional distress due to open narrative</i> |                      |                   |         |
|---------------------------------------------------------|----------------------|-------------------|---------|
| Descriptors                                             |                      | aOR*<br>(95% CI)  | p-value |
| <b>Open narrative</b>                                   | No                   | 1.00              |         |
|                                                         | Yes                  | 1.20 (0.98, 1.47) | 0.084   |
| <b>Respondent</b>                                       | Mother               | 1.00              |         |
|                                                         | Father               | 0.72 (0.49, 1.07) | 0.102   |
|                                                         | Grandparent          | 0.23 (0.13, 0.39) | <0.001  |
|                                                         | Others               | 0.04 (0.01, 0.28) | 0.001   |
| <b>Child's age</b>                                      | Neonate              | 1.00              |         |
|                                                         | Infant               | 1.42 (1.09, 1.85) | 0.010   |
|                                                         | Child under-5        | 1.21 (0.86, 1.69) | 0.274   |
| <b>Child's sex</b>                                      | Male                 | 1.00              |         |
|                                                         | Female               | 0.99 (0.80, 1.22) | 0.920   |
| <b>Location of death</b>                                | Home                 | 1.00              |         |
|                                                         | Health centre        | 1.36 (1.04, 1.77) | 0.023   |
|                                                         | MDH                  | 0.96 (0.72, 1.27) | 0.753   |
|                                                         | En route to hospital | 1.49 (1.00, 2.22) | 0.049   |
|                                                         | Other                | 0.38 (0.23, 0.64) | <0.001  |
| <b>Socio-economic status by tercile</b>                 | Tercile 1 (Lowest)   | 1.00              |         |
|                                                         | Tercile 2 (Middle)   | 1.52 (1.17, 1.97) | 0.002   |
|                                                         | Tercile 3 (Highest)  | 1.49 (1.13, 1.95) | 0.004   |
| <b>Delay between death &amp; VA (Weeks)</b>             |                      | 0.98 (0.98, 0.99) | 0.002   |

564 \*All variables presented were included in the adjusted analysis

565

1  
2  
3  
4  
5  
6  
7  
8  
9  
10  
11  
12  
13  
14  
15  
16  
17  
18  
19  
20  
21  
22  
23  
24  
25  
26  
27  
28  
29  
30  
31  
32  
33  
34  
35  
36  
37  
38  
39  
40  
41  
42  
43  
44  
45  
46  
47  
48  
49  
50  
51  
52  
53  
54  
55  
56  
57  
58  
59  
60

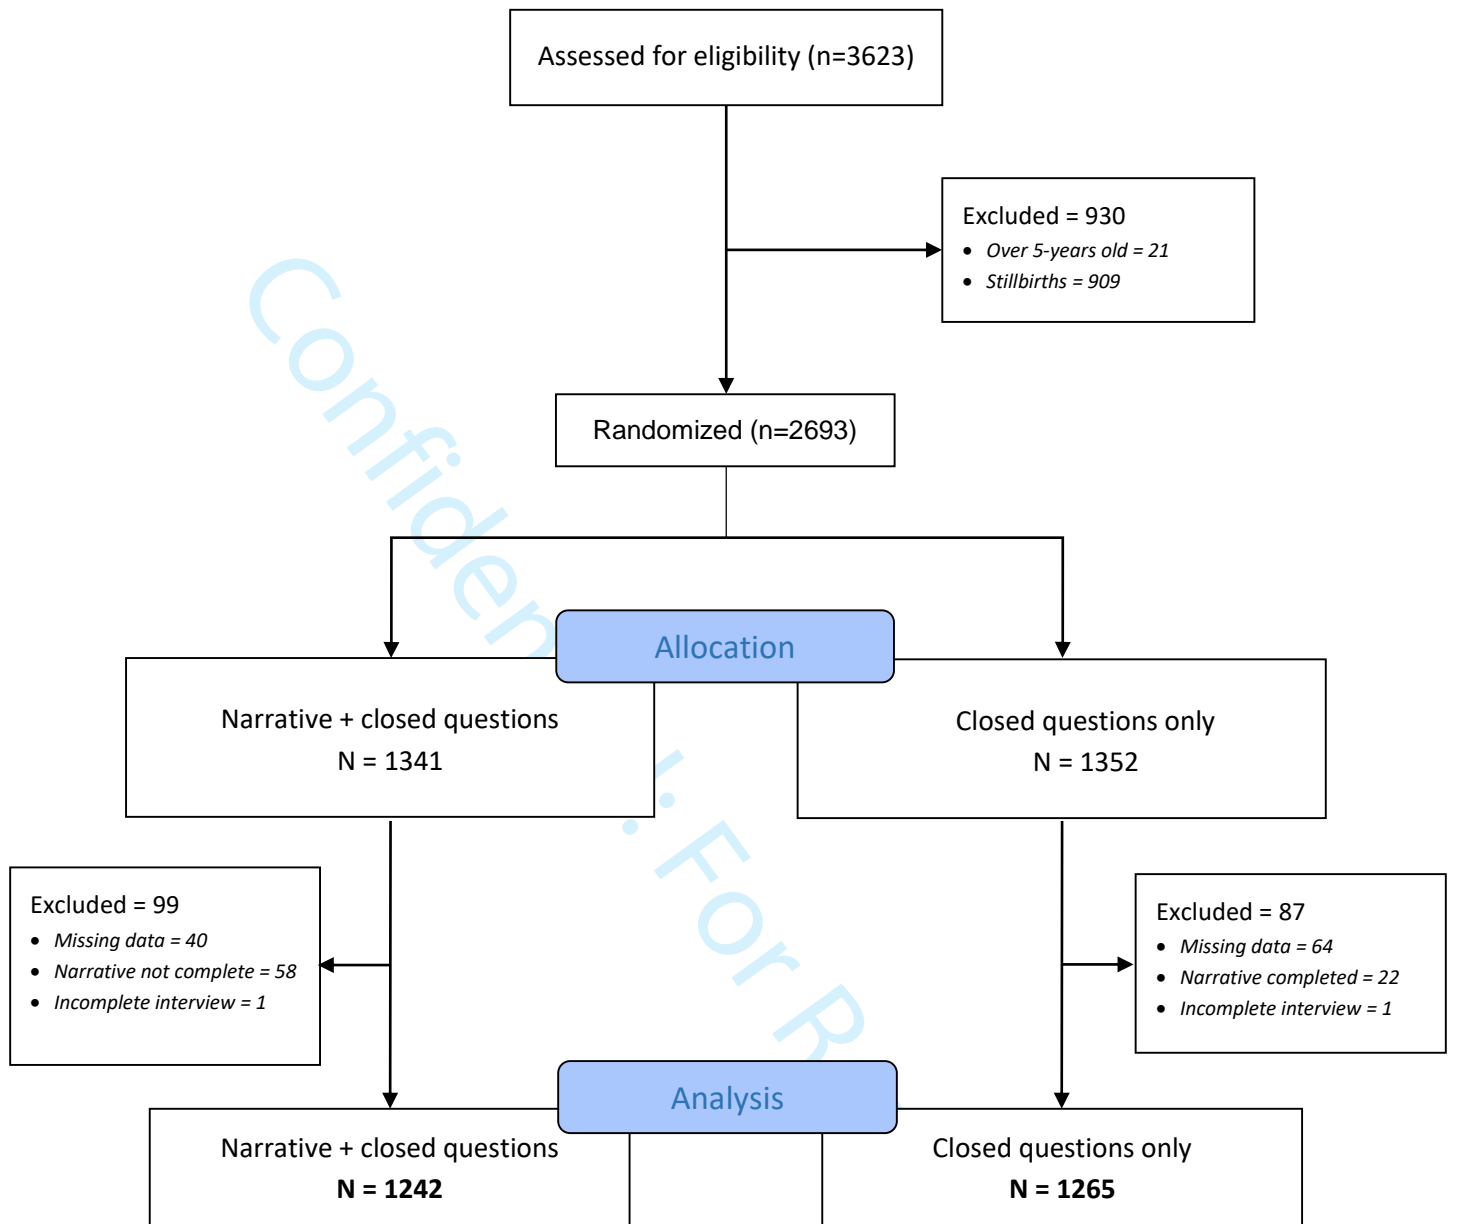

**Web-Appendix 1: Group discussion topic guide**

1. What is your experience of conducting verbal autopsies?
2. Can you describe the typical interview process?
3. Thinking specifically about interviews which DID NOT have an open narrative:
  - a. How did you establish a rapport with the respondents?
  - b. Did you feel the quality of the responses was accurate?
  - c. Were there any issues in conducting the interviews?
4. Now thinking specifically about the interviews which DID have an open narrative:
  - a. How did you establish a rapport with the respondents?
  - b. Did you feel the quality of the responses was accurate?
  - c. Were there any issues in conducting the interviews?
5. Overall, what were the biggest challenges in conducting the verbal autopsies?
6. Overall, did you feel there were any positive aspects of conducting these interviews?
7. Did you feel the open narrative improved the interview process for respondents? And for you? Why / Why not?
8. If you could recommend a best practice for conducting verbal autopsies, what would it be? Why?



**Web-appendix 2: Comparison of interviews which did not comply with the randomisation protocol**

|                                         | Interview conducted<br>per protocol<br>(n=2507) | Protocol violation           |                           |
|-----------------------------------------|-------------------------------------------------|------------------------------|---------------------------|
|                                         |                                                 | No narrative group<br>(n=22) | Narrative group<br>(n=58) |
| <b>Respondent</b>                       |                                                 |                              |                           |
| Mother                                  | 1931 (77.0%)                                    | 19 (86.4%)                   | 46 (79.3%)                |
| Father                                  | 200 (8.0%)                                      | 2 (9.1%)                     | 4 (6.9%)                  |
| Grandparent                             | 266 (10.6%)                                     | -                            | 6 (10.3%)                 |
| Other                                   | 110 (4.4%)                                      | 1 (4.6%)                     | 2 (3.5%)                  |
| <b>Socio-economic status by tercile</b> |                                                 |                              |                           |
| Tercile 1 (Lowest)                      | 838 (33.4%)                                     | 6 (27.3%)                    | 20 (34.5%)                |
| Tercile 2 (Middle)                      | 879 (35.1%)                                     | 8 (36.4%)                    | 19 (32.8%)                |
| Tercile 3 (Highest)                     | 790 (31.5%)                                     | 8 (36.4%)                    | 19 (32.8%)                |
| <b>Child's age</b>                      |                                                 |                              |                           |
| Neonate (0-4 weeks)                     | 1058 (41.9%)                                    | 7 (32.8%)                    | 19 (32.8%)                |
| Infant (5-52 weeks)                     | 654 (26.4%)                                     | 10 (45.5%)                   | 18 (31.0%)                |
| Child (12-59 months)                    | 795 (31.7%)                                     | 5 (22.7%)                    | 21 (36.2%)                |
| <b>Child's sex*</b>                     |                                                 |                              |                           |
| Male                                    | 1326 (52.9%)                                    | 9 (40.1%)                    | 24 (42.1%)                |
| Female                                  | 1181 (47.1%)                                    | 13 (59.1%)                   | 33 (57.9%)                |
| <b>Location of death</b>                |                                                 |                              |                           |
| Home                                    | 797 (31.8%)                                     | 8 (36.4%)                    | 13 (22.4%)                |
| Health centre                           | 652 (26.0%)                                     | 5 (22.7%)                    | 20 (34.5%)                |
| MDH                                     | 616 (24.6%)                                     | 5 (22.7%)                    | 12 (20.7%)                |
| En-route to hospital                    | 181 (7.2%)                                      | -                            | 6 (10.3%)                 |
| Other                                   | 261 (10.4%)                                     | 4 (18.2%)                    | 7 (12.1%)                 |
| <b>Mean (SD)</b>                        |                                                 |                              |                           |
| Delay between death and VA (weeks)      | 22.5 (15.5)                                     | 25.5 (14.9)                  | 23.0 (14.3)               |

\*One child in the non-compliant narrative group was missing a value for sex.

## Web-Appendix 3: Comparison of randomised groups

|                                         | No Narrative<br>N = 1265 (51%) | Narrative<br>N = 1242 (49%) | Total<br>N = 2507 | <i>p-value</i> |
|-----------------------------------------|--------------------------------|-----------------------------|-------------------|----------------|
| <b>Respondent</b>                       |                                |                             |                   |                |
| Mother                                  | 985 (77.9%)                    | 946 (76.2%)                 | 1931 (77.0%)      |                |
| Father                                  | 95 (7.5%)                      | 105 (8.5%)                  | 200 (8.0%)        |                |
| Grandparent                             | 125 (9.9%)                     | 141 (11.4%)                 | 266 (10.6%)       |                |
| Other                                   | 60 (4.7%)                      | 50 (4.0%)                   | 110 (4.4%)        | 0.400          |
| <b>Socio-economic status by tercile</b> |                                |                             |                   |                |
| Tercile 1 (Lowest)                      | 408 (32.3%)                    | 430 (34.6%)                 | 838 (33.4%)       |                |
| Tercile 2 (Middle)                      | 459 (36.3%)                    | 420 (33.8%)                 | 879 (35.1%)       |                |
| Tercile 3 (Highest)                     | 398 (31.5%)                    | 392 (31.6%)                 | 790 (31.5%)       | 0.343          |
| <b>Child's age</b>                      |                                |                             |                   |                |
| Neonate (0-4 weeks)                     | 505 (39.9%)                    | 553 (44.5%)                 | 1058 (41.9%)      |                |
| Infant (5-52 weeks)                     | 352 (27.8%)                    | 302 (24.3%)                 | 654 (26.4%)       |                |
| Child (12-59 months)                    | 408 (32.3%)                    | 387 (31.2%)                 | 795 (31.7%)       | 0.042          |
| <b>Child's sex</b>                      |                                |                             |                   |                |
| Male                                    | 677 (53.5%)                    | 649 (52.3%)                 | 1326 (52.9%)      |                |
| Female                                  | 588 (46.5%)                    | 593 (47.8%)                 | 1181 (47.1%)      | 0.526          |
| <b>Location of death</b>                |                                |                             |                   |                |
| Home                                    | 408 (32.3%)                    | 389 (31.3%)                 | 797 (31.8%)       |                |
| Health centre                           | 327 (26.9%)                    | 325 (26.2%)                 | 652 (26.0%)       |                |
| MDH                                     | 297 (23.5%)                    | 319 (25.7%)                 | 616 (24.6%)       |                |
| En route to hospital                    | 78 (6.2%)                      | 103 (8.3%)                  | 181 (7.2%)        |                |
| Other                                   | 155 (12.3%)                    | 106 (8.5%)                  | 261 (10.4%)       | 0.008          |
|                                         | <b>Mean (SD)</b>               | <b>Mean (SD)</b>            |                   |                |
| Delay between death and VA (Weeks)      | 22.6 (15.5)                    | 22.5 (15.4)                 | 22.5 (15.5)       | 0.838          |
