# Supplementary material for: Added value of an open narrative in verbal autopsies: a mixed-methods evaluation from Malawi
Source: PubMed Central journal article supplement (PMC7871275; doi:10.1136/bmjpo-2020-000961), 2021-02-05
Supplement: bmjpo-2020-000961supp001.pdf [file bmjpo-2020-000961supp001.pdf]

**Web-Appendix 1: Group discussion topic guide**

1. What is your experience of conducting verbal autopsies?
2. Can you describe the typical interview process?
3. Thinking specifically about interviews which DID NOT have an open narrative:
  - a. How did you establish a rapport with the respondents?
  - b. Did you feel the quality of the responses was accurate?
  - c. Were there any issues in conducting the interviews?
4. Now thinking specifically about the interviews which DID have an open narrative:
  - a. How did you establish a rapport with the respondents?
  - b. Did you feel the quality of the responses was accurate?
  - c. Were there any issues in conducting the interviews?
5. Overall, what were the biggest challenges in conducting the verbal autopsies?
6. Overall, did you feel there were any positive aspects of conducting these interviews?
7. Did you feel the open narrative improved the interview process for respondents? And for you? Why / Why not?
8. If you could recommend a best practice for conducting verbal autopsies, what would it be? Why?

**Web-appendix 2: Comparison of interviews which did not comply with the randomisation protocol**

|                                         | Interview conducted<br>per protocol<br>(n=2507) | Protocol violation           |                           |
|-----------------------------------------|-------------------------------------------------|------------------------------|---------------------------|
|                                         |                                                 | No narrative group<br>(n=22) | Narrative group<br>(n=58) |
| <b>Respondent</b>                       |                                                 |                              |                           |
| Mother                                  | 1931 (77.0%)                                    | 19 (86.4%)                   | 46 (79.3%)                |
| Father                                  | 200 (8.0%)                                      | 2 (9.1%)                     | 4 (6.9%)                  |
| Grandparent                             | 266 (10.6%)                                     | -                            | 6 (10.3%)                 |
| Other                                   | 110 (4.4%)                                      | 1 (4.6%)                     | 2 (3.5%)                  |
| <b>Socio-economic status by tercile</b> |                                                 |                              |                           |
| Tercile 1 (Lowest)                      | 838 (33.4%)                                     | 6 (27.3%)                    | 20 (34.5%)                |
| Tercile 2 (Middle)                      | 879 (35.1%)                                     | 8 (36.4%)                    | 19 (32.8%)                |
| Tercile 3 (Highest)                     | 790 (31.5%)                                     | 8 (36.4%)                    | 19 (32.8%)                |
| <b>Child's age</b>                      |                                                 |                              |                           |
| Neonate (0-4 weeks)                     | 1058 (41.9%)                                    | 7 (32.8%)                    | 19 (32.8%)                |
| Infant (5-52 weeks)                     | 654 (26.4%)                                     | 10 (45.5%)                   | 18 (31.0%)                |
| Child (12-59 months)                    | 795 (31.7%)                                     | 5 (22.7%)                    | 21 (36.2%)                |
| <b>Child's sex*</b>                     |                                                 |                              |                           |
| Male                                    | 1326 (52.9%)                                    | 9 (40.1%)                    | 24 (42.1%)                |
| Female                                  | 1181 (47.1%)                                    | 13 (59.1%)                   | 33 (57.9%)                |
| <b>Location of death</b>                |                                                 |                              |                           |
| Home                                    | 797 (31.8%)                                     | 8 (36.4%)                    | 13 (22.4%)                |
| Health centre                           | 652 (26.0%)                                     | 5 (22.7%)                    | 20 (34.5%)                |
| MDH                                     | 616 (24.6%)                                     | 5 (22.7%)                    | 12 (20.7%)                |
| En-route to hospital                    | 181 (7.2%)                                      | -                            | 6 (10.3%)                 |
| Other                                   | 261 (10.4%)                                     | 4 (18.2%)                    | 7 (12.1%)                 |
| <b>Mean (SD)</b>                        |                                                 |                              |                           |
| Delay between death and VA (weeks)      | 22.5 (15.5)                                     | 25.5 (14.9)                  | 23.0 (14.3)               |

\*One child in the non-compliant narrative group was missing a value for sex.

**Web-Appendix 3: Comparison of randomised groups**

|                                         | No Narrative<br>N = 1265 (51%) | Narrative<br>N = 1242 (49%) | Total<br>N = 2507 | <i>p-value</i> |
|-----------------------------------------|--------------------------------|-----------------------------|-------------------|----------------|
| <b>Respondent</b>                       |                                |                             |                   |                |
| Mother                                  | 985 (77.9%)                    | 946 (76.2%)                 | 1931 (77.0%)      |                |
| Father                                  | 95 (7.5%)                      | 105 (8.5%)                  | 200 (8.0%)        |                |
| Grandparent                             | 125 (9.9%)                     | 141 (11.4%)                 | 266 (10.6%)       |                |
| Other                                   | 60 (4.7%)                      | 50 (4.0%)                   | 110 (4.4%)        | 0.400          |
| <b>Socio-economic status by tercile</b> |                                |                             |                   |                |
| Tercile 1 (Lowest)                      | 408 (32.3%)                    | 430 (34.6%)                 | 838 (33.4%)       |                |
| Tercile 2 (Middle)                      | 459 (36.3%)                    | 420 (33.8%)                 | 879 (35.1%)       |                |
| Tercile 3 (Highest)                     | 398 (31.5%)                    | 392 (31.6%)                 | 790 (31.5%)       | 0.343          |
| <b>Child's age</b>                      |                                |                             |                   |                |
| Neonate (0-4 weeks)                     | 505 (39.9%)                    | 553 (44.5%)                 | 1058 (41.9%)      |                |
| Infant (5-52 weeks)                     | 352 (27.8%)                    | 302 (24.3%)                 | 654 (26.4%)       |                |
| Child (12-59 months)                    | 408 (32.3%)                    | 387 (31.2%)                 | 795 (31.7%)       | 0.042          |
| <b>Child's sex</b>                      |                                |                             |                   |                |
| Male                                    | 677 (53.5%)                    | 649 (52.3%)                 | 1326 (52.9%)      |                |
| Female                                  | 588 (46.5%)                    | 593 (47.8%)                 | 1181 (47.1%)      | 0.526          |
| <b>Location of death</b>                |                                |                             |                   |                |
| Home                                    | 408 (32.3%)                    | 389 (31.3%)                 | 797 (31.8%)       |                |
| Health centre                           | 327 (26.9%)                    | 325 (26.2%)                 | 652 (26.0%)       |                |
| MDH                                     | 297 (23.5%)                    | 319 (25.7%)                 | 616 (24.6%)       |                |
| En route to hospital                    | 78 (6.2%)                      | 103 (8.3%)                  | 181 (7.2%)        |                |
| Other                                   | 155 (12.3%)                    | 106 (8.5%)                  | 261 (10.4%)       | 0.008          |
|                                         | <b>Mean (SD)</b>               | <b>Mean (SD)</b>            |                   |                |
| Delay between death and VA (Weeks)      | 22.6 (15.5)                    | 22.5 (15.4)                 | 22.5 (15.5)       | 0.838          |
